# Supplementary material for: Synthesis, structure and reactivity of guanidinate rare earth metal bis(o-aminobenzyl) complexes
Source: Royal Society of Chemistry journal article supplement (doi:10.1039/c7ra04524g), 2017-01-01
Supplement: c7ra04524g1.pdf [file c7ra04524g1.pdf]

## *Supporting Information*

### **Synthesis, structure and reactivity of guanidinate rare earth metal bis(*o*-aminobenzyl) complexes**

Feng Kong,<sup>a</sup> Meng Li<sup>a</sup>, Xigeng Zhou<sup>a</sup> and Lixin Zhang<sup>a\*</sup>

#### **Contents**

NMR spectra of all complexes (Except for **2c**, **3c**, **4c** and **5c**) (Page 2-15)

NMR spectra of representative PIP (Page 16-17 )

GPC curves of PIP obtained by complex **2a**/[Ph<sub>3</sub>C][B(C<sub>6</sub>F<sub>5</sub>)<sub>4</sub>] binary system (Page 18)

Molecular structure of **3b-d**, **4c**, **4d**, **5c** and **5d** (Page 19-23)

Crytalographic data and structure refinement details of **1**, **3b-d**, **4c**, **4d**, **5c** and **5d**  
(Page 24-25)

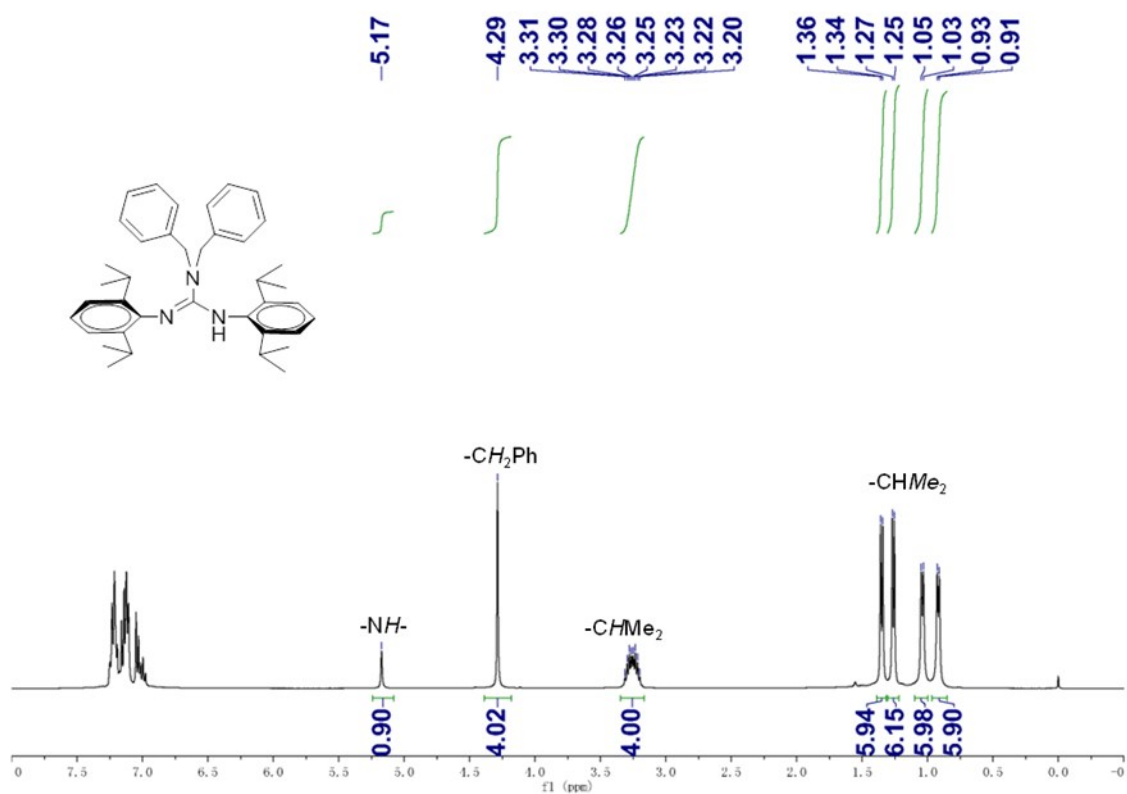

**Figure S1.**  $^1\text{H}$  NMR spectrum of **1** obtained in  $\text{CDCl}_3$  at room temperature.

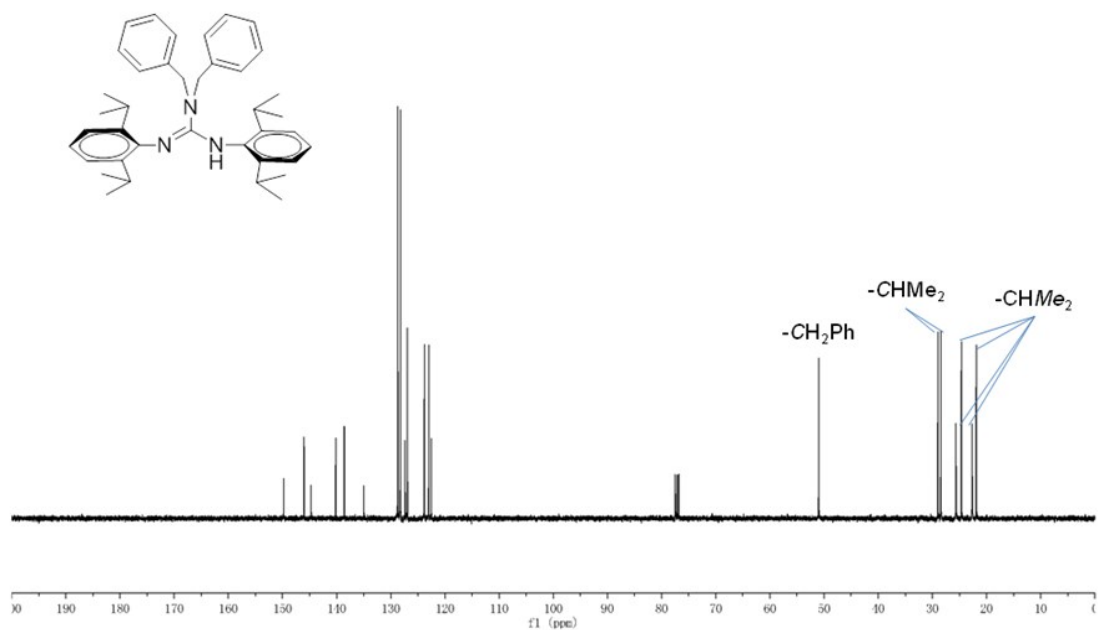

**Figure S2.**  $^{13}\text{C}$  NMR spectrum of **1** obtained in  $\text{CDCl}_3$  at room temperature.

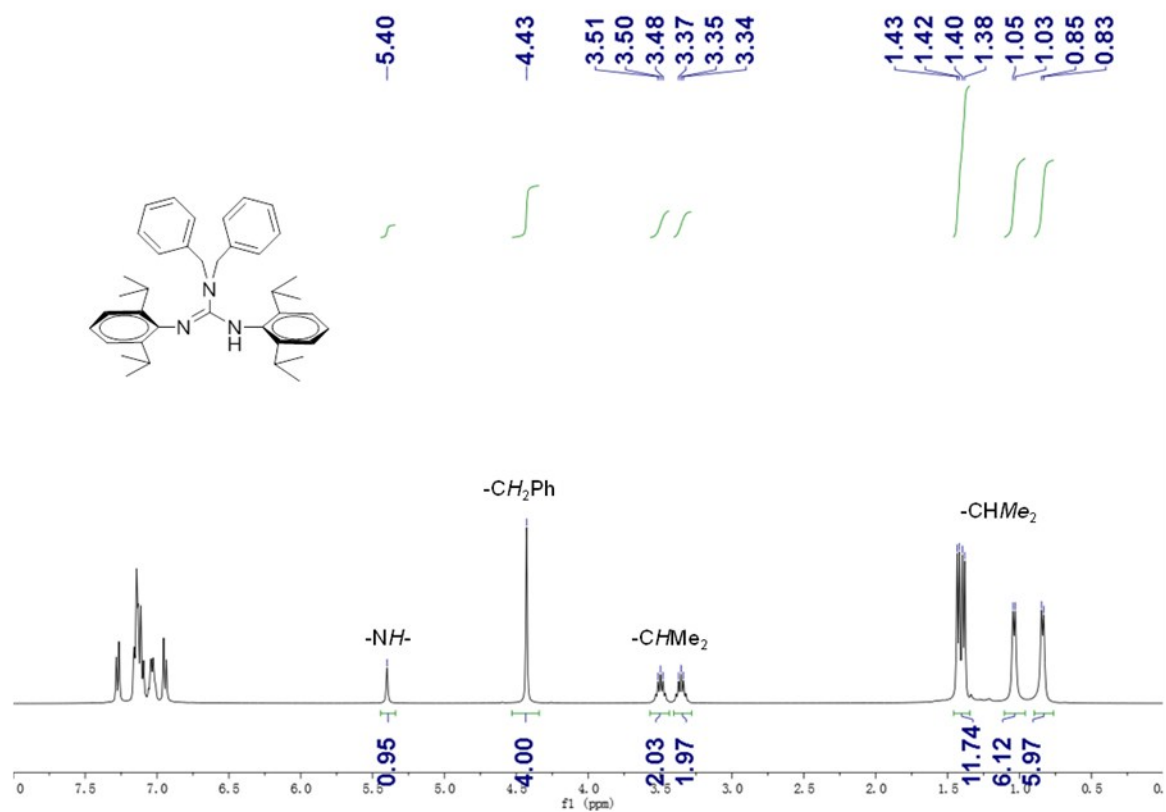

**Figure S3.**  $^1\text{H}$  NMR spectrum of **1** obtained in  $\text{C}_6\text{D}_6$  at room temperature.

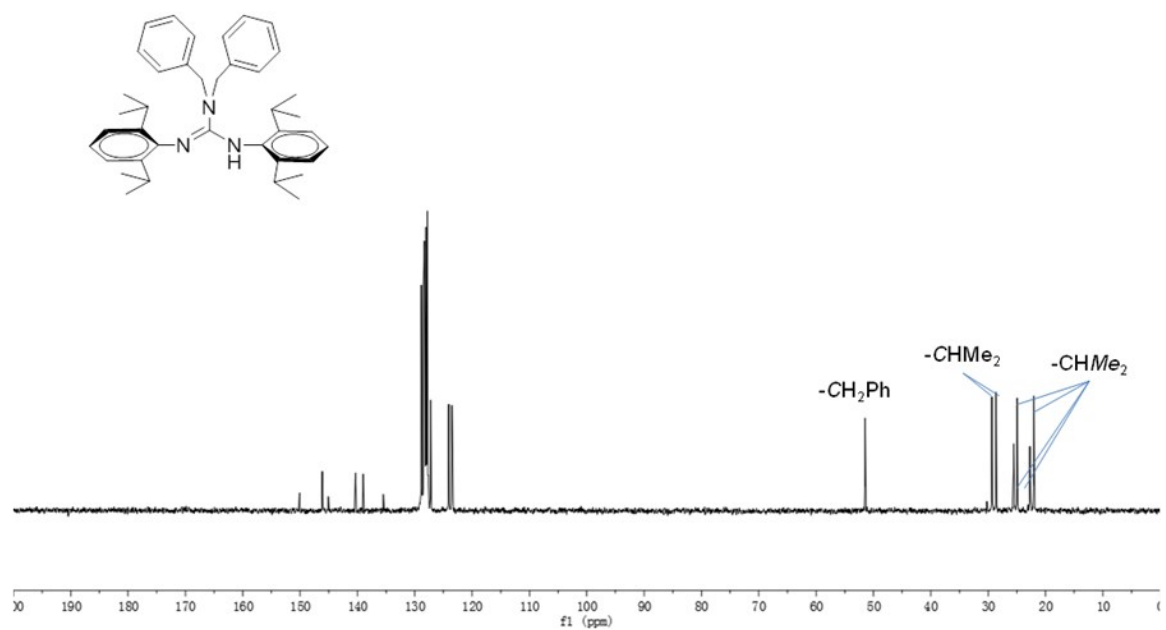

**Figure S4.**  $^{13}\text{C}$  NMR spectrum of **1** obtained in  $\text{C}_6\text{D}_6$  at room temperature.

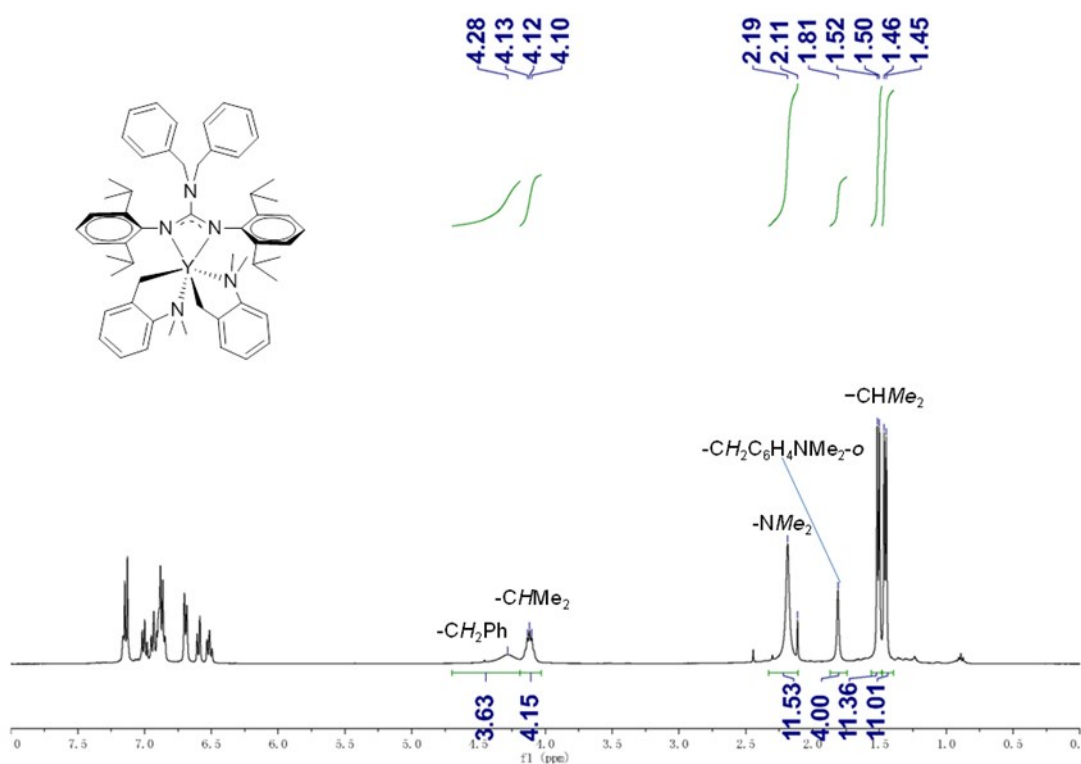

Figure S5.  $^1\text{H}$  NMR spectrum of **2a** obtained in  $\text{C}_6\text{D}_6$  at room temperature.

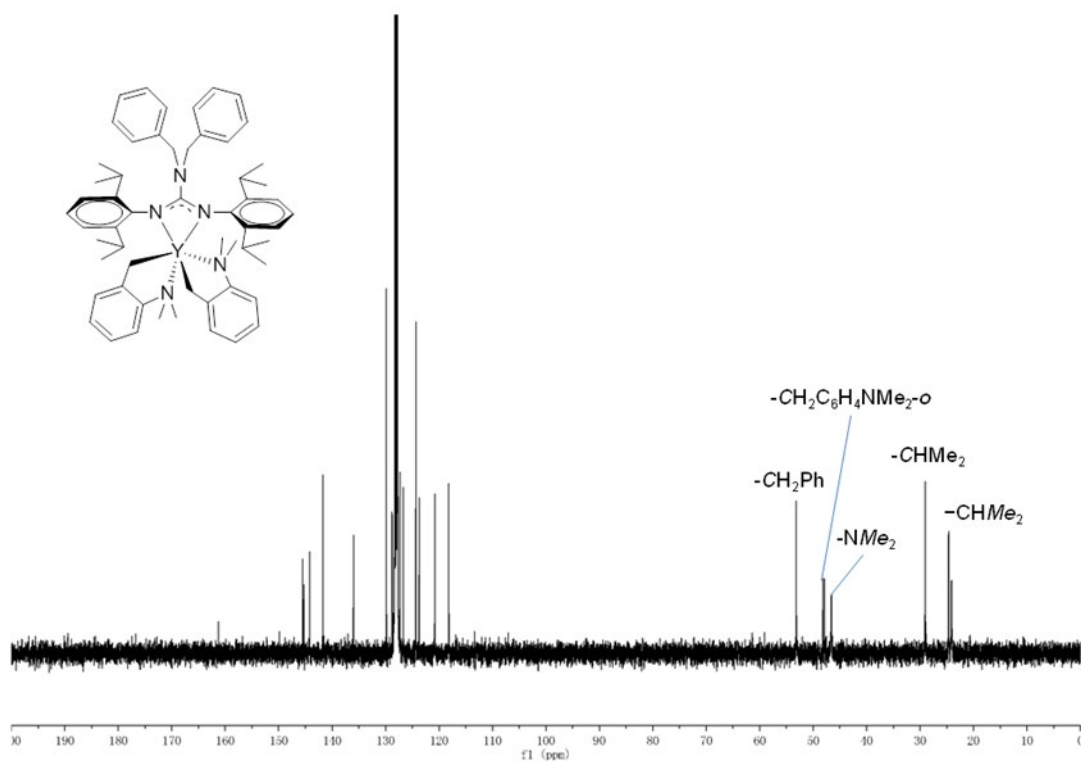

Figure S6.  $^{13}\text{C}$  NMR spectrum of **2a** obtained in  $\text{C}_6\text{D}_6$  at room temperature.

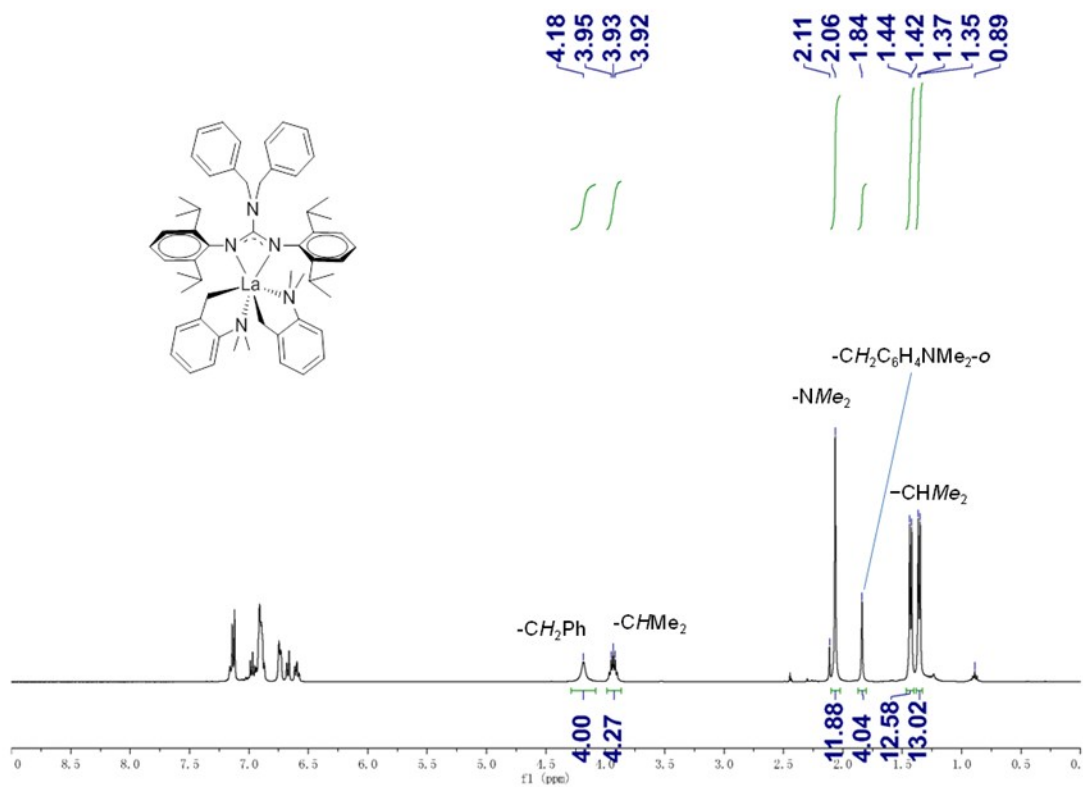

**Figure S7.**  $^1\text{H}$  NMR spectrum of **2b** obtained in  $\text{C}_6\text{D}_6$  at room temperature.

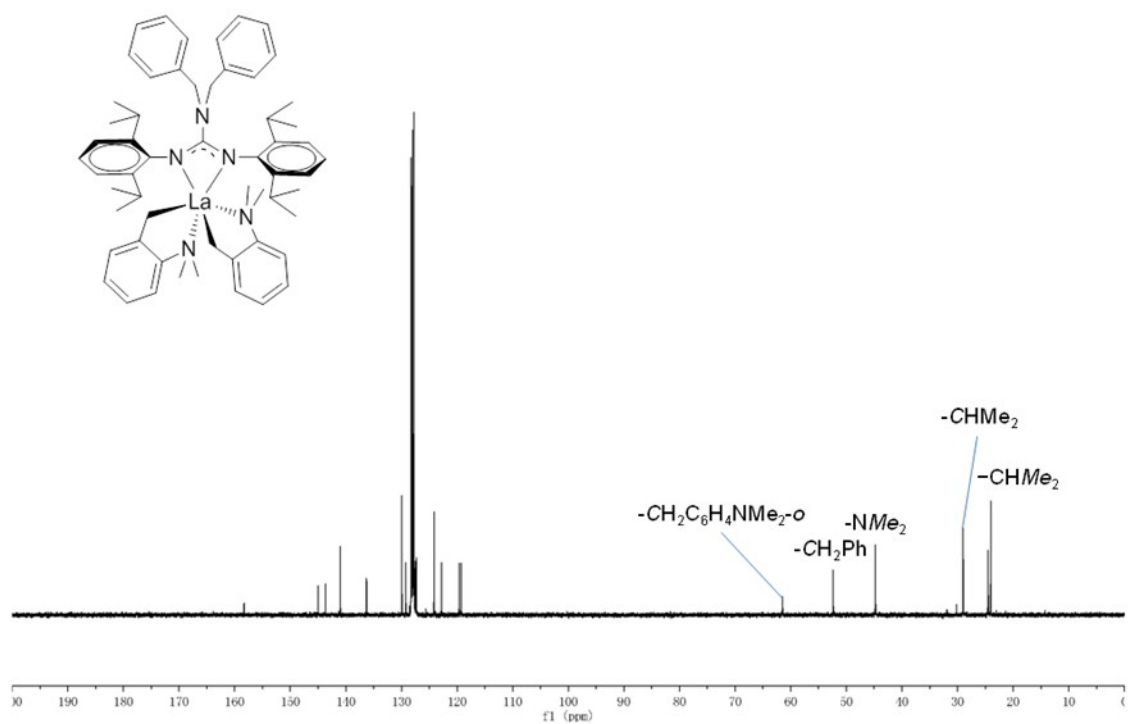

**Figure S8.**  $^{13}\text{C}$  NMR spectrum of **2b** obtained in  $\text{C}_6\text{D}_6$  at room temperature.

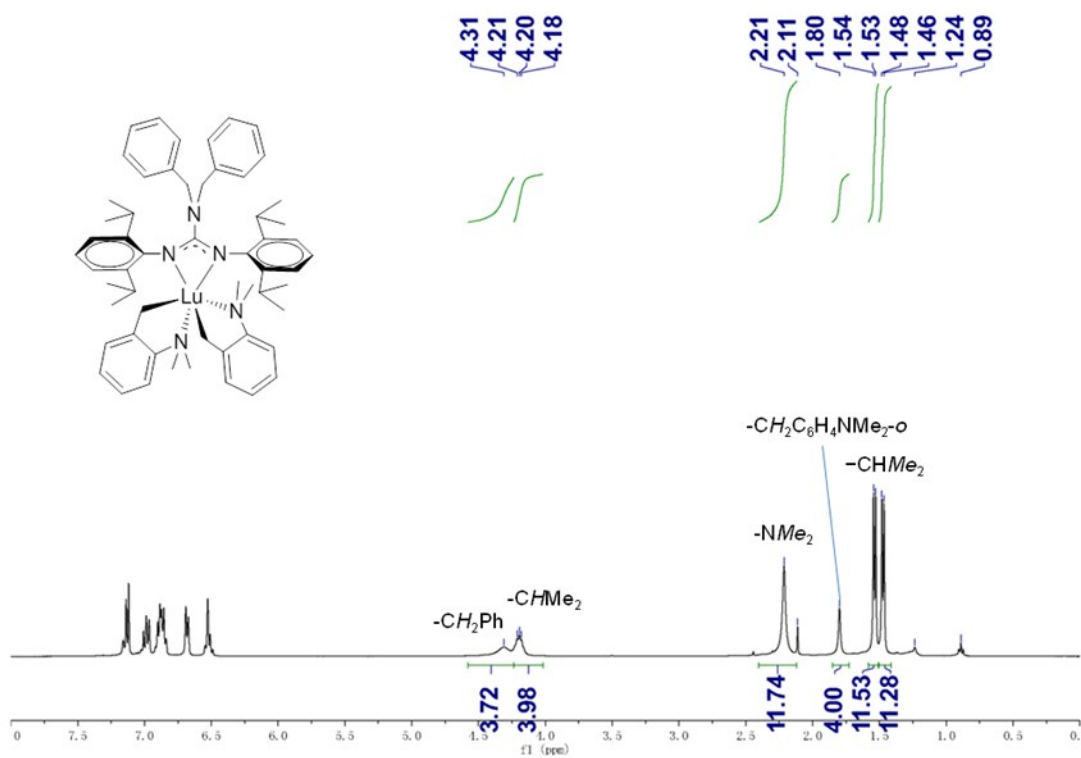

**Figure S9.**  $^1\text{H}$  NMR spectrum of **2d** obtained in  $\text{C}_6\text{D}_6$  at room temperature.

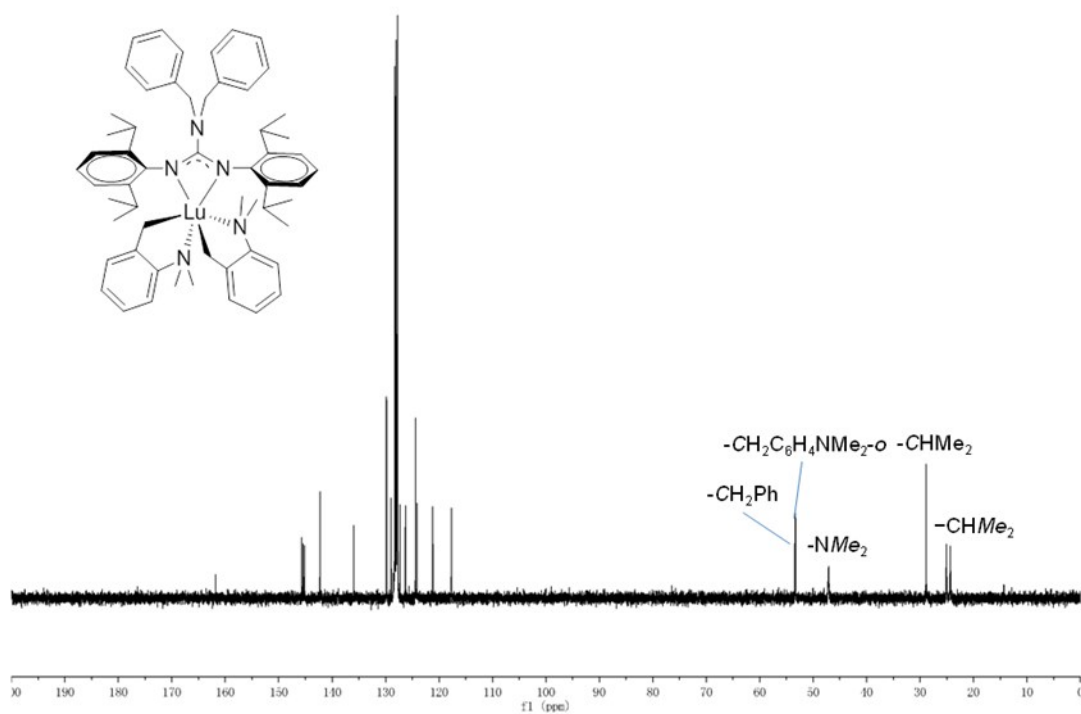

**Figure S10.**  $^{13}\text{C}$  NMR spectrum of **2d** obtained in  $\text{C}_6\text{D}_6$  at room temperature.

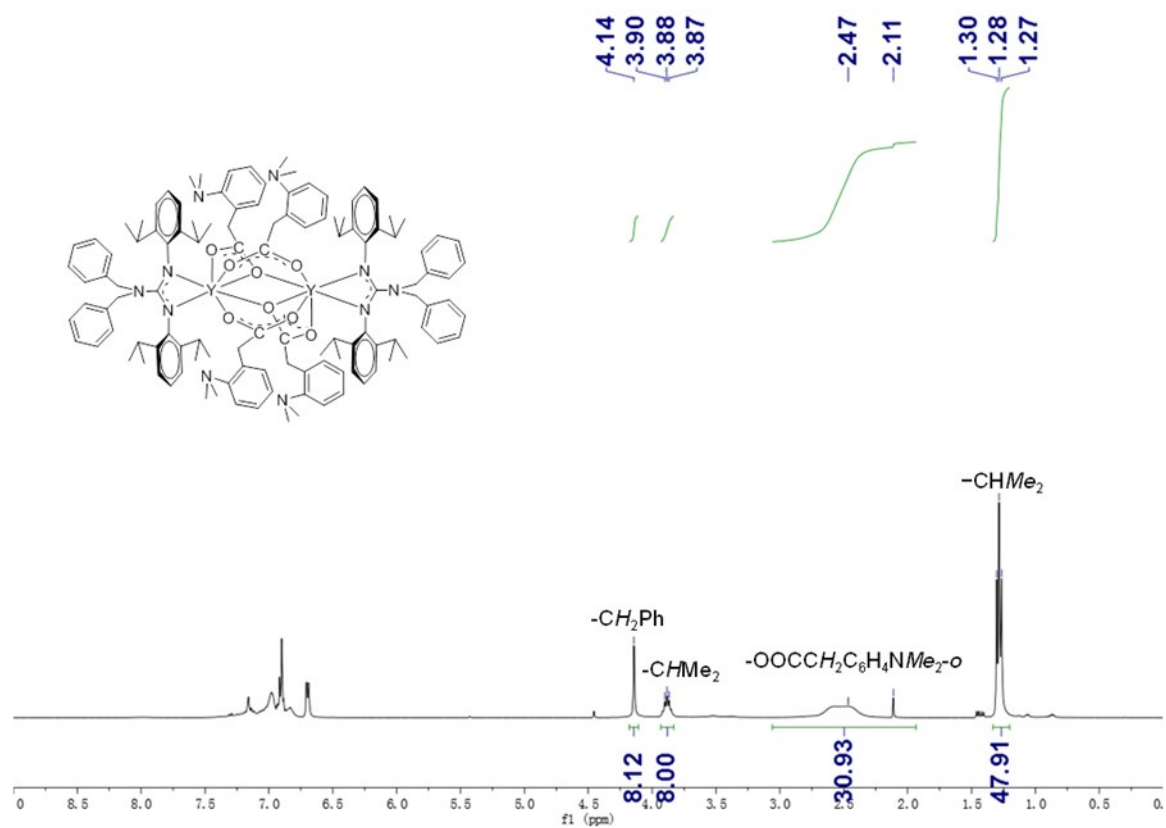

Figure S11.  $^1\text{H}$  NMR spectrum of **3a** obtained in  $\text{C}_6\text{D}_6$  at room temperature.

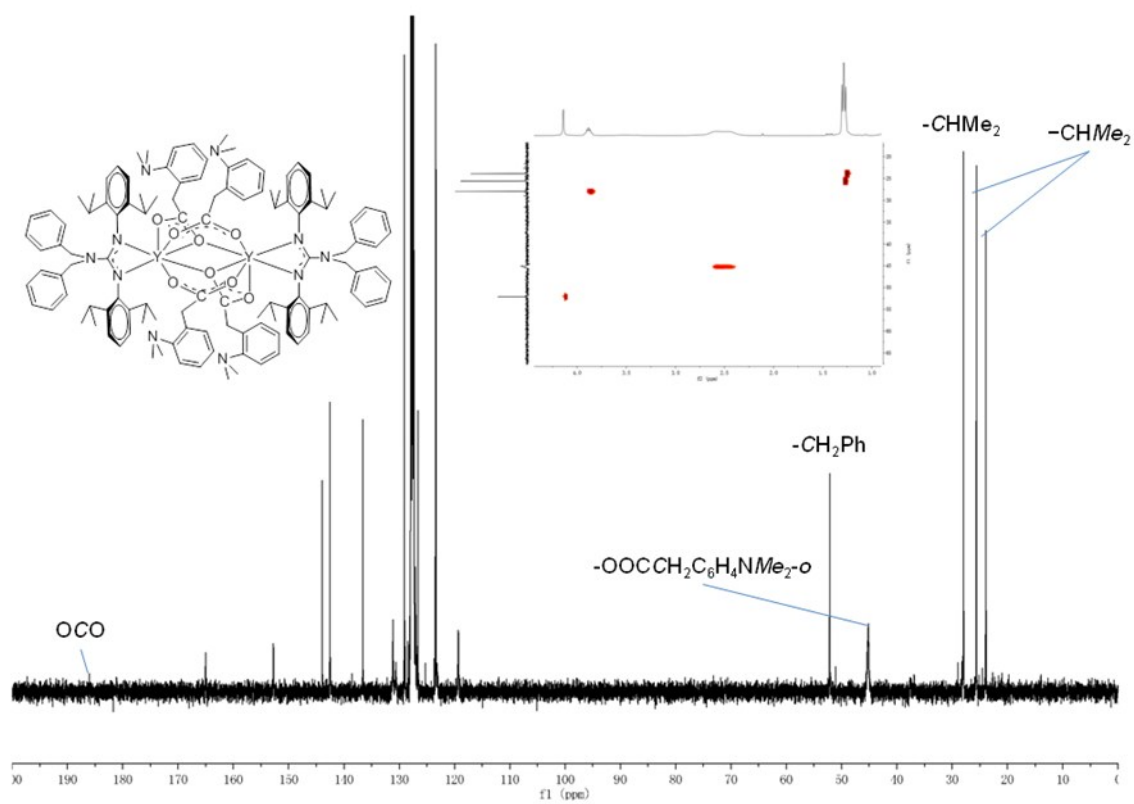

Figure S12.  $^{13}\text{C}$  NMR spectrum of **3a** obtained in  $\text{C}_6\text{D}_6$  at room temperature.

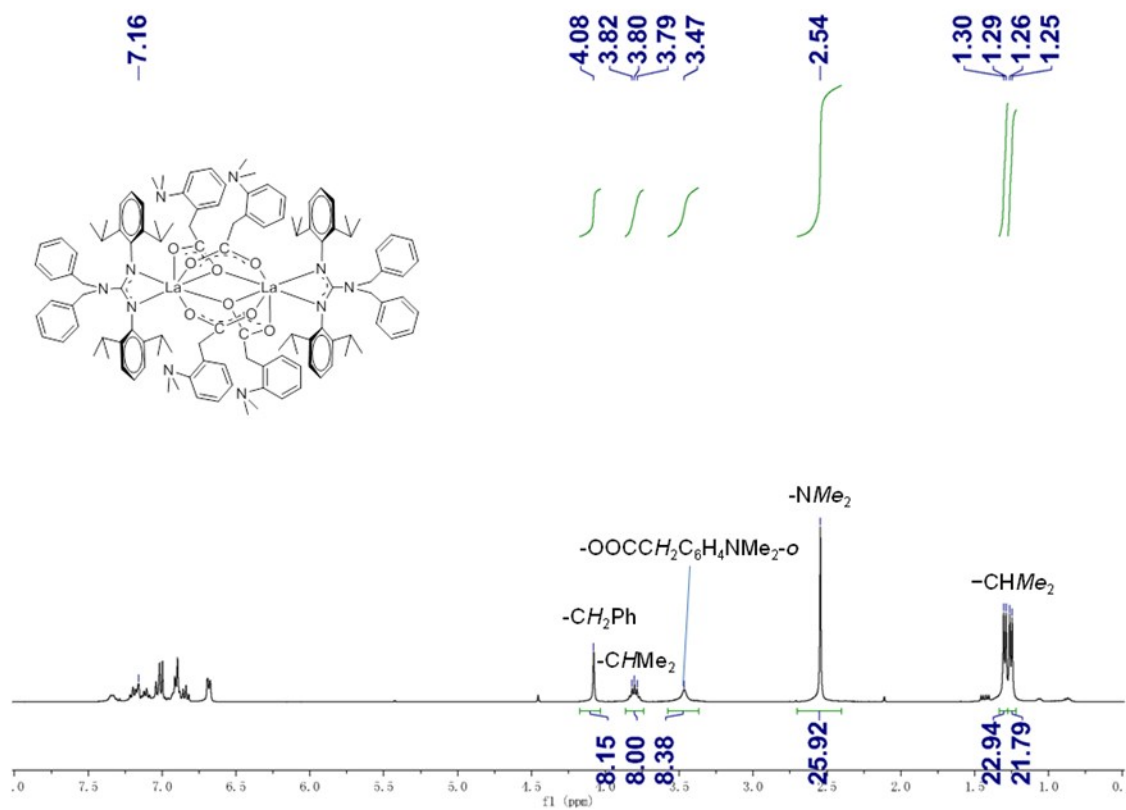

Figure S13.  $^1\text{H}$  NMR spectrum of **3b** obtained in  $\text{C}_6\text{D}_6$  at room temperature.

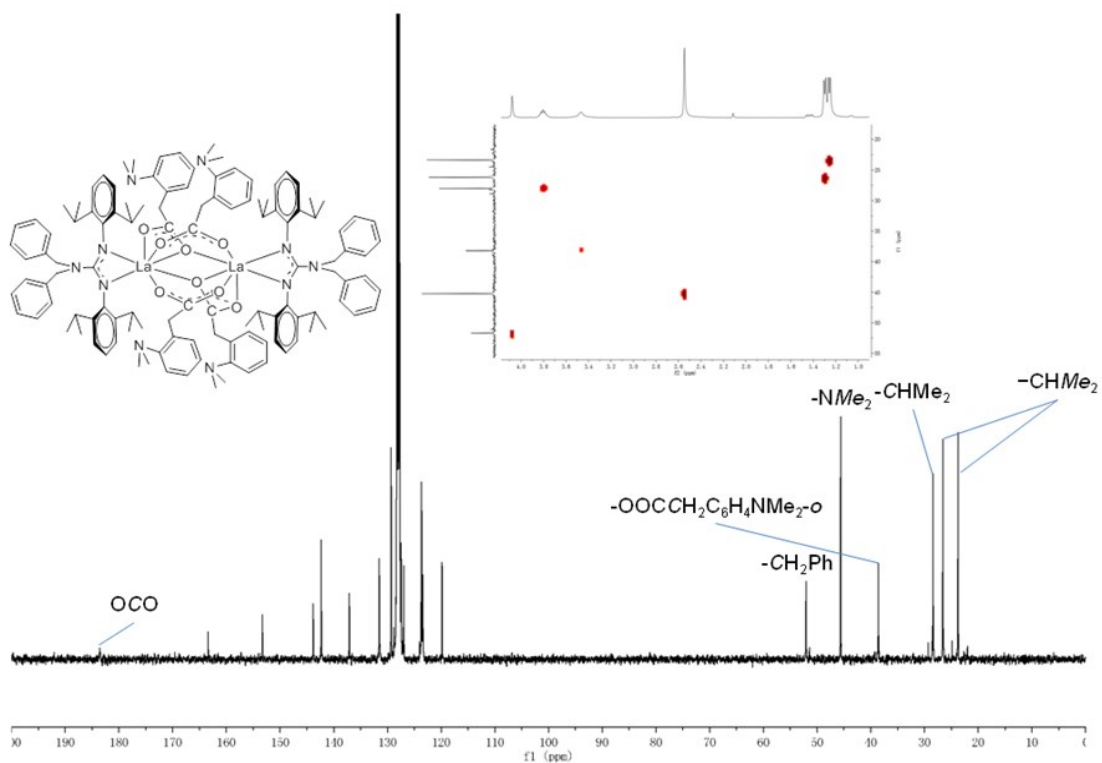

Figure S14.  $^{13}\text{C}$  NMR spectrum of **3b** obtained in  $\text{C}_6\text{D}_6$  at room temperature.



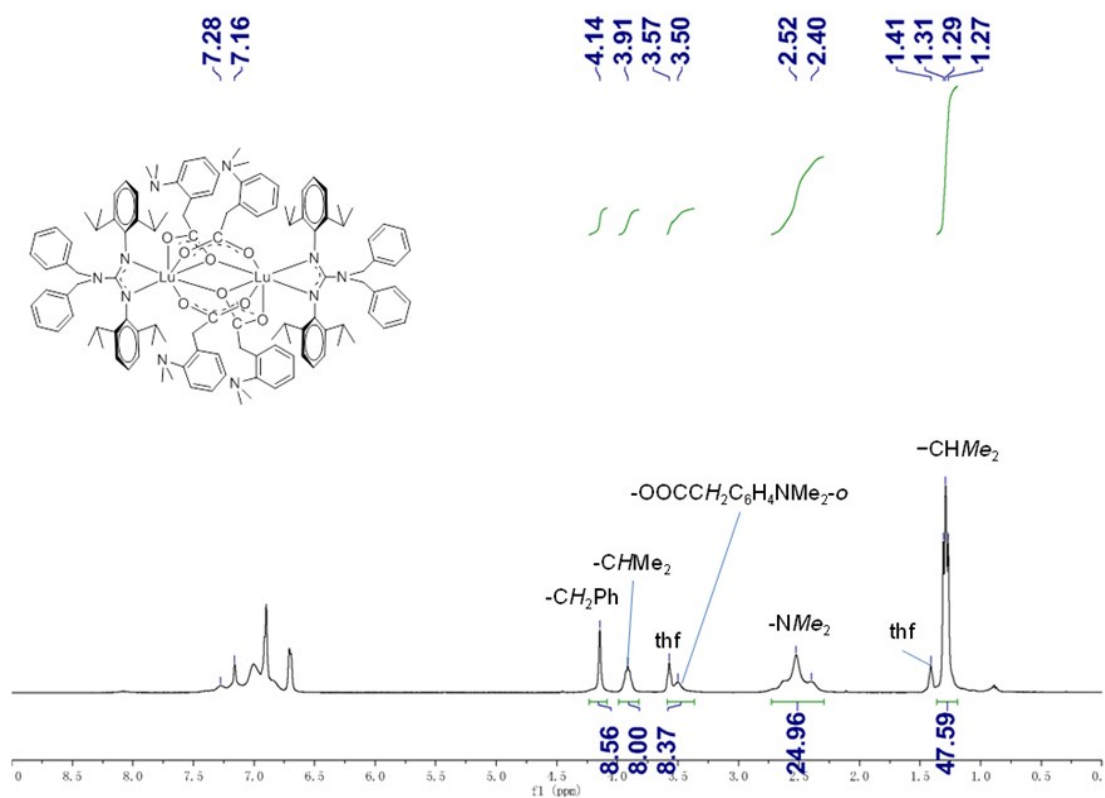

**Figure S15.**  $^1\text{H}$  NMR spectrum of **3d** obtained in  $\text{C}_6\text{D}_6$  at room temperature.

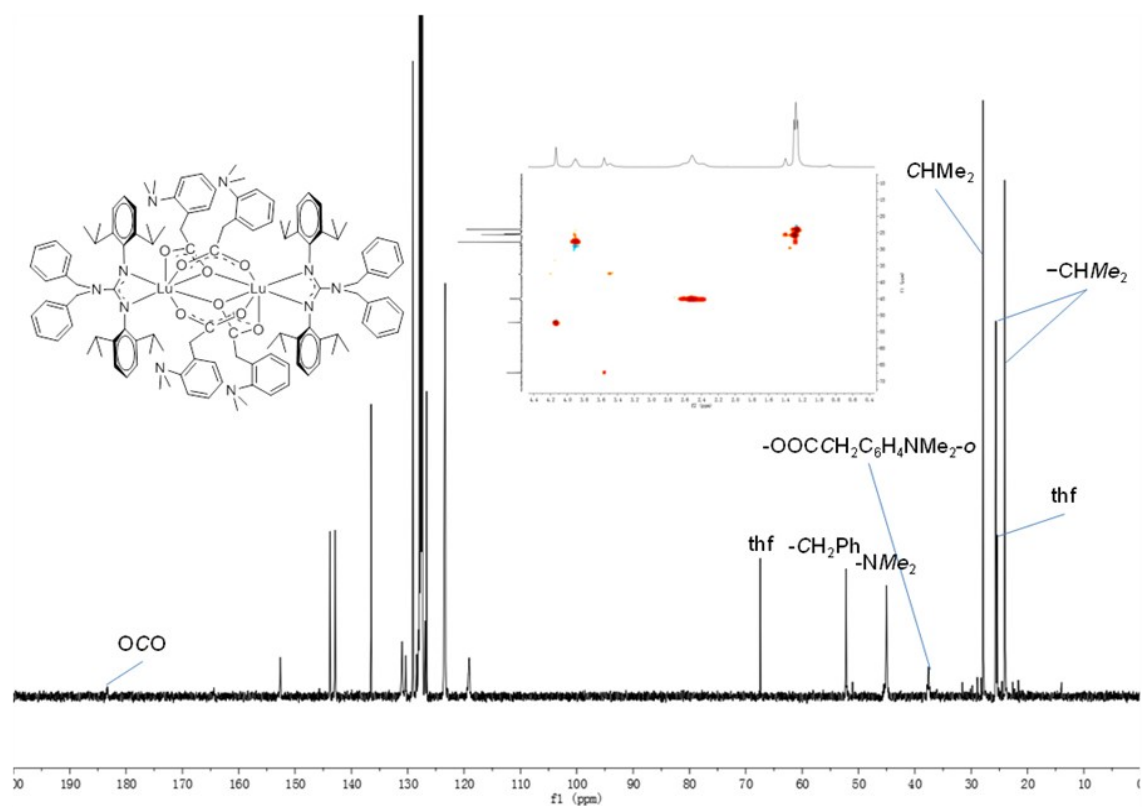

**Figure S16.**  $^{13}\text{C}$  NMR spectrum of **3d** obtained in  $\text{C}_6\text{D}_6$  at room temperature.

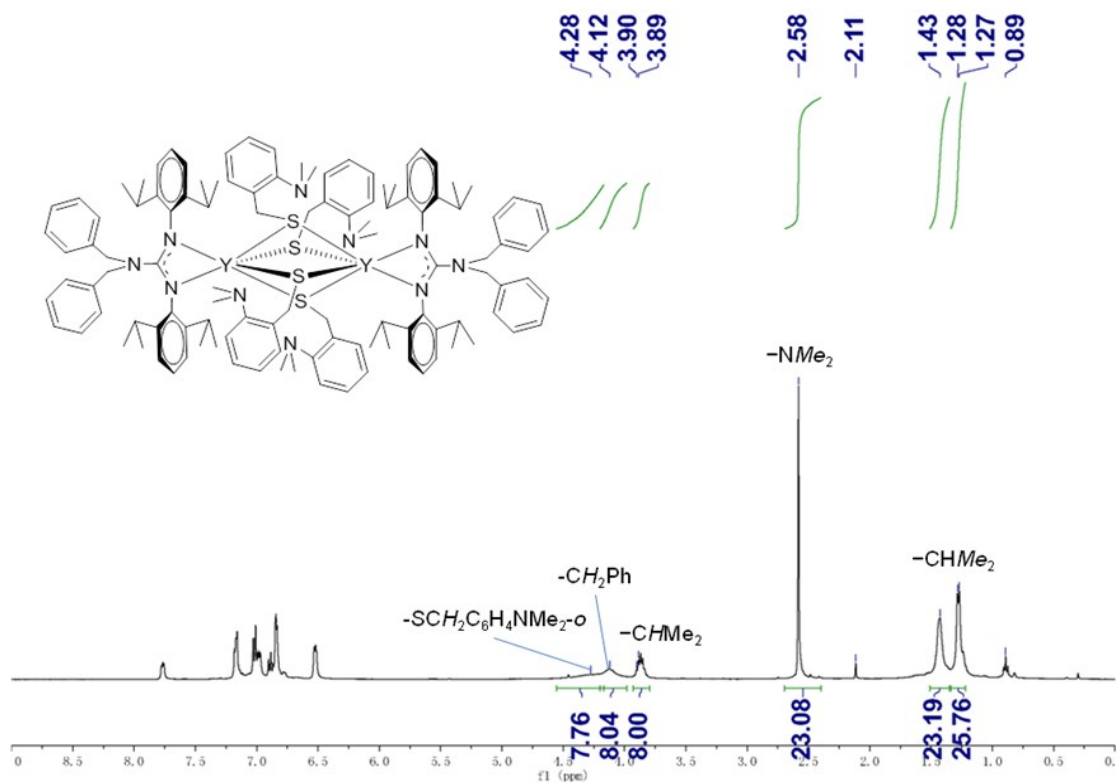

**Figure S17.**  $^1\text{H}$  NMR spectrum of **4a** obtained in  $\text{C}_6\text{D}_6$  at room temperature.

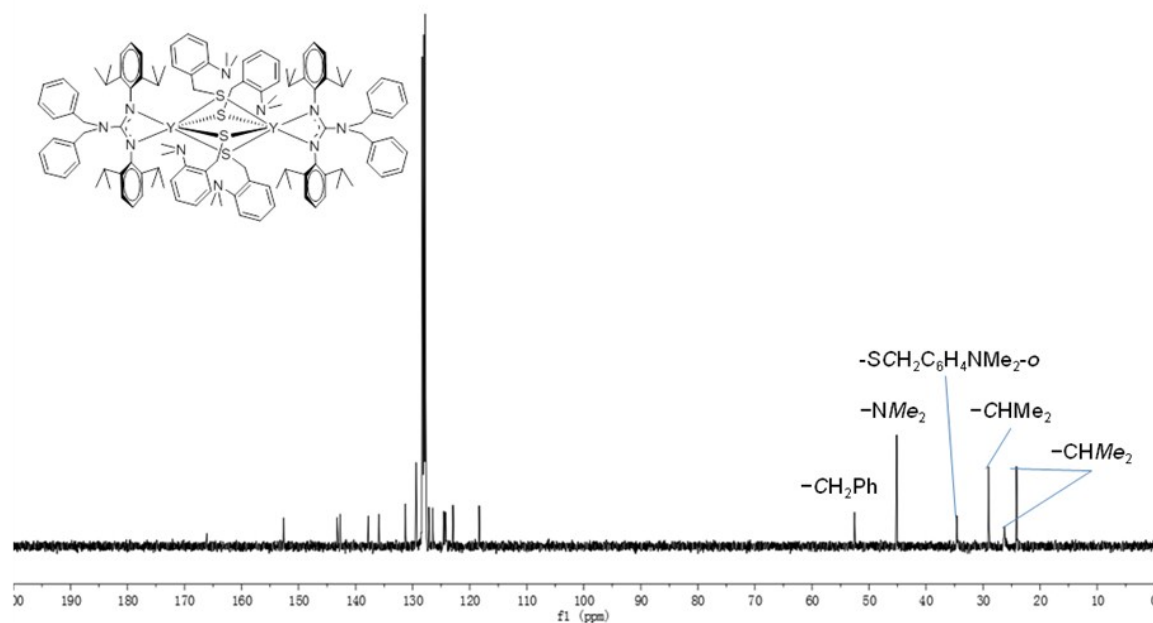

**Figure S18.**  $^{13}\text{C}$  NMR spectrum of **4a** obtained in  $\text{C}_6\text{D}_6$  at room temperature.

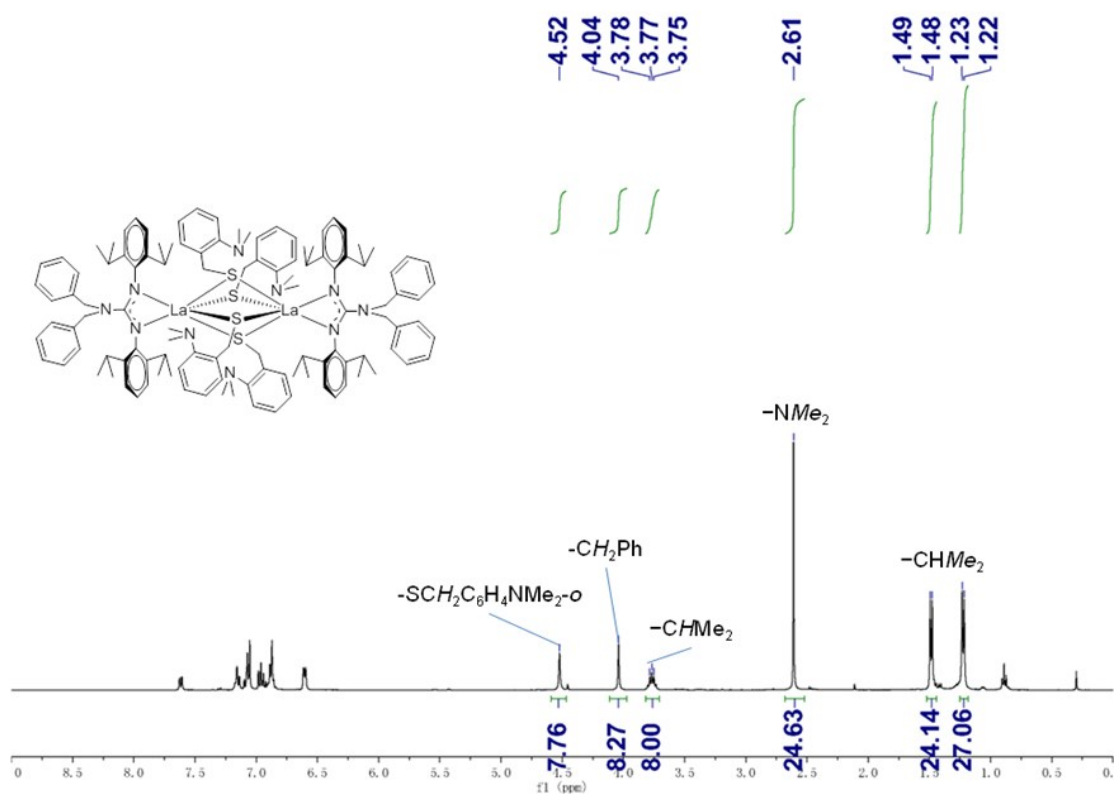

**Figure S19.**  $^1\text{H}$  NMR spectrum of **4b** obtained in  $\text{C}_6\text{D}_6$  at room temperature.

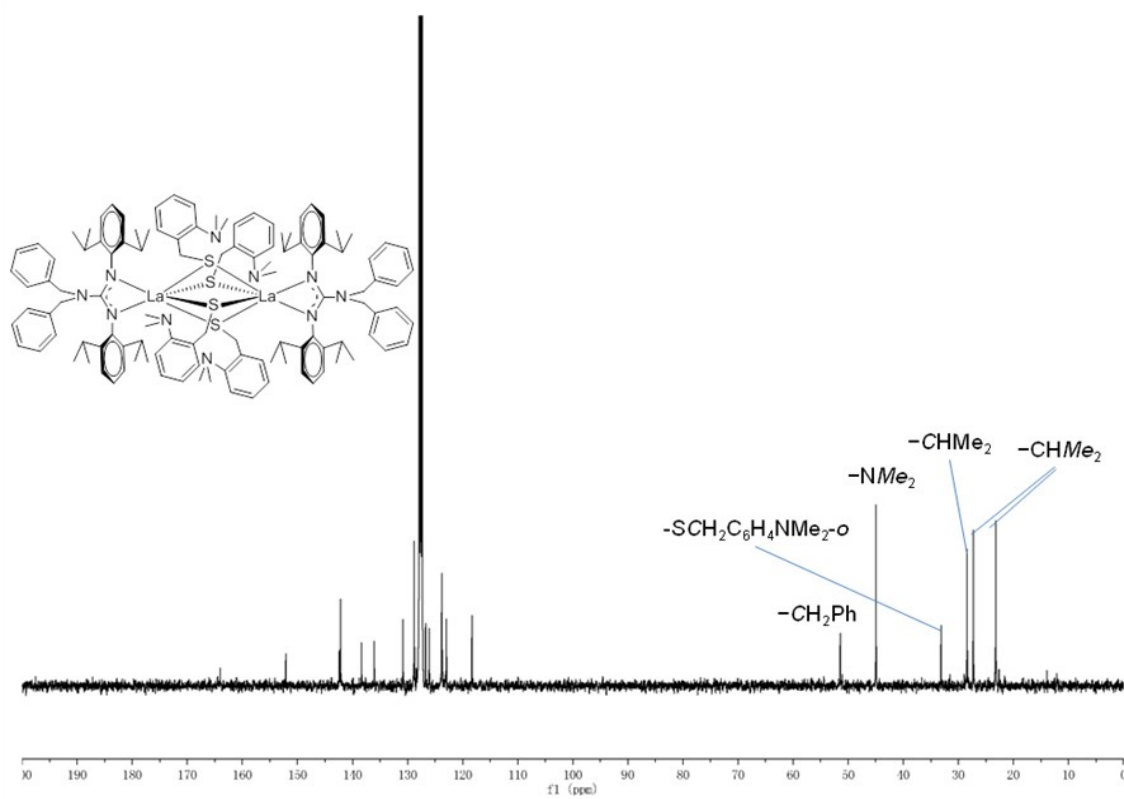

**Figure S20.**  $^{13}\text{C}$  NMR spectrum of **4b** obtained in  $\text{C}_6\text{D}_6$  at room temperature.

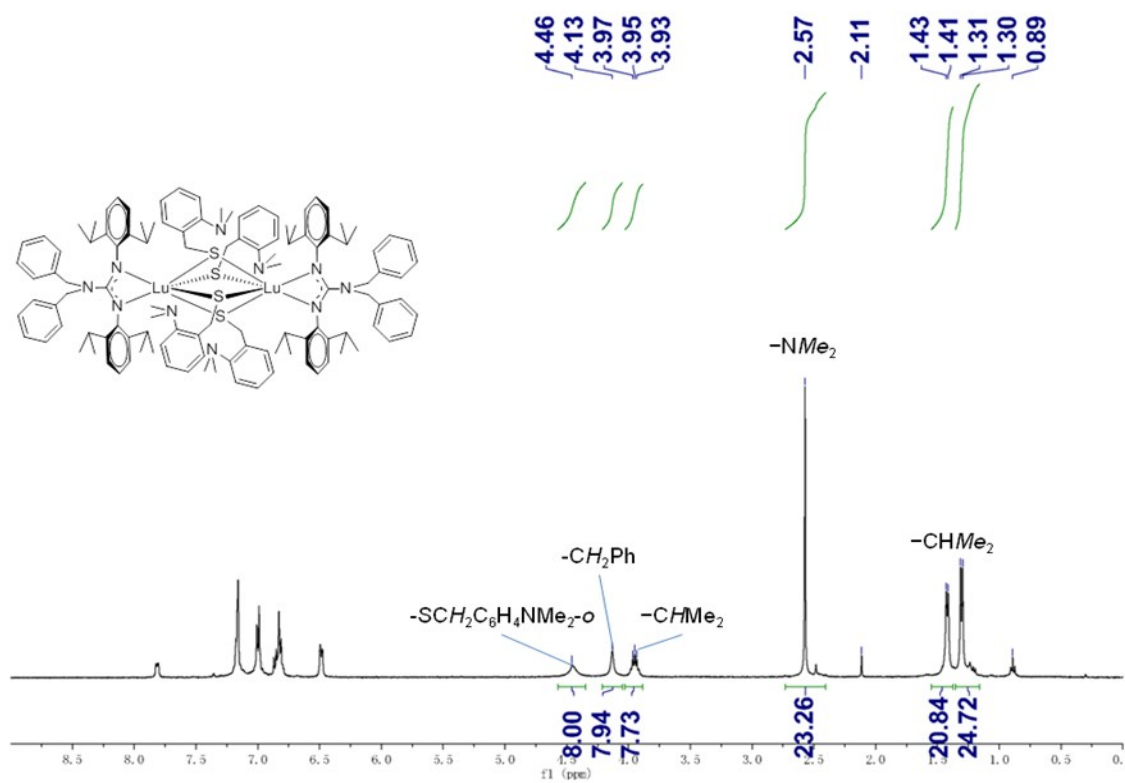

**Figure S21.**  $^1\text{H}$  NMR spectrum of **4d** obtained in  $\text{C}_6\text{D}_6$  at room temperature.

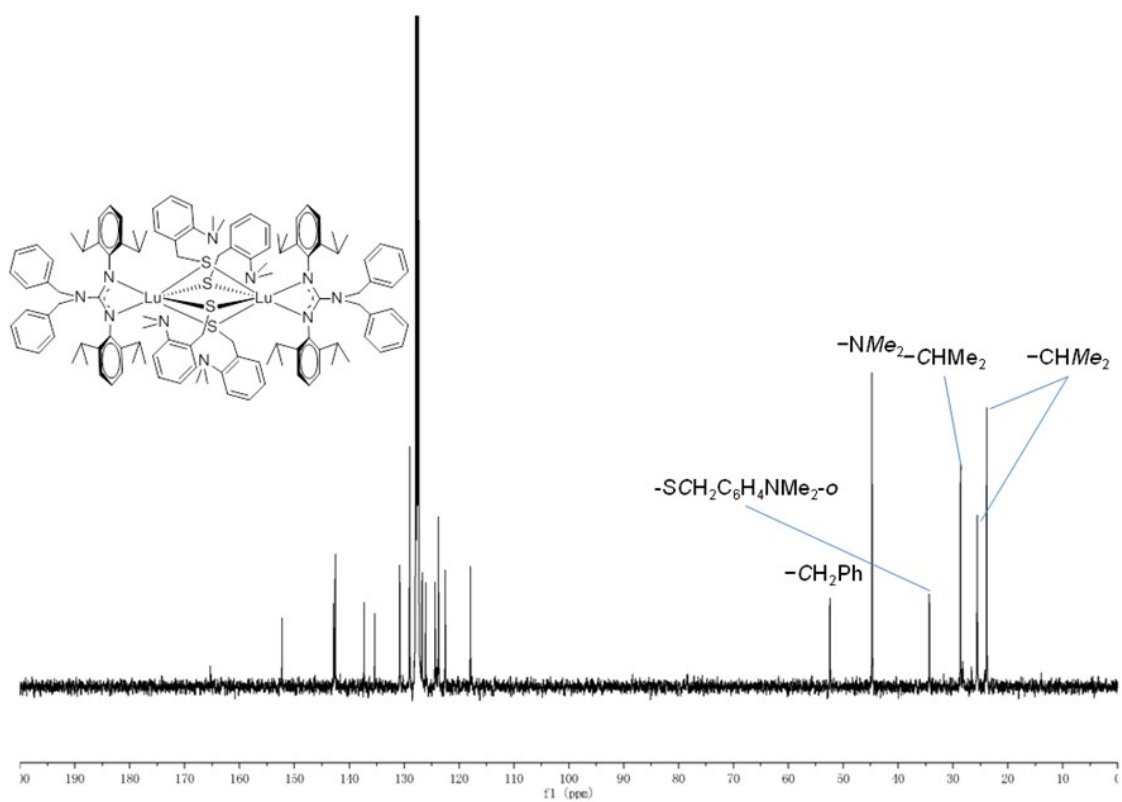

**Figure S22.**  $^{13}\text{C}$  NMR spectrum of **4d** obtained in  $\text{C}_6\text{D}_6$  at room temperature.

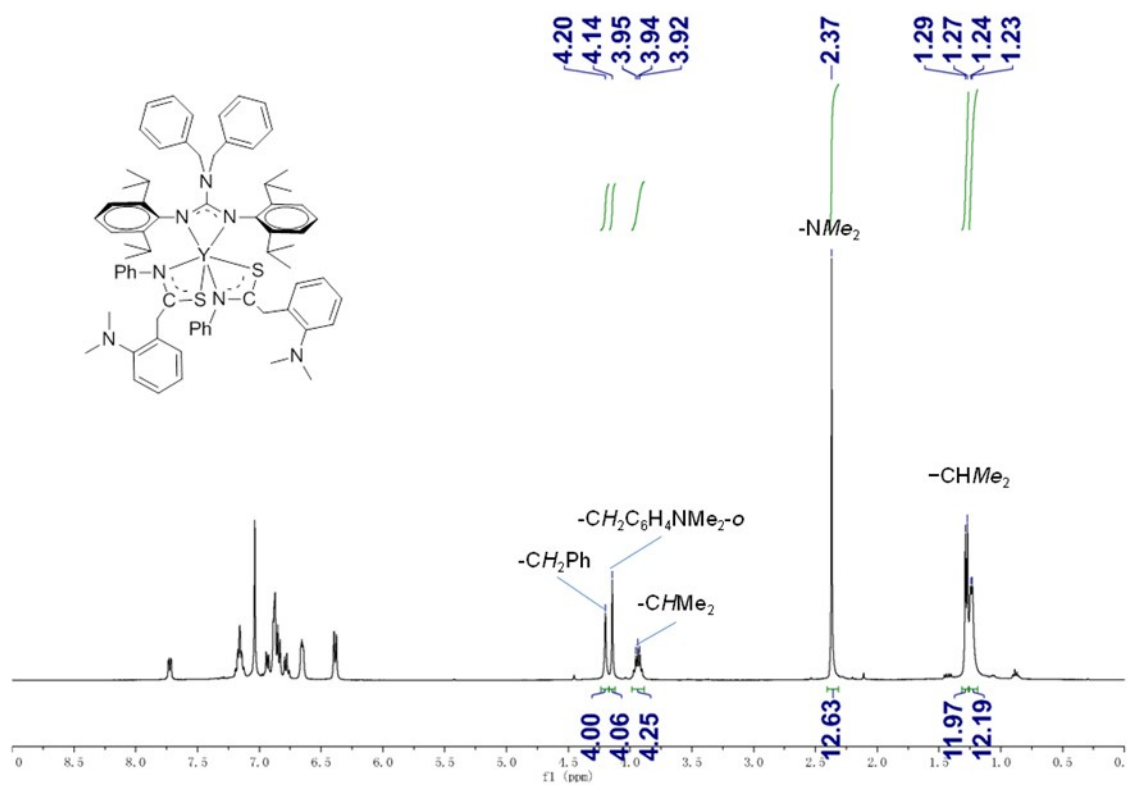

**Figure S23.**  $^1\text{H}$  NMR spectrum of **5a** obtained in  $\text{C}_6\text{D}_6$  at room temperature.

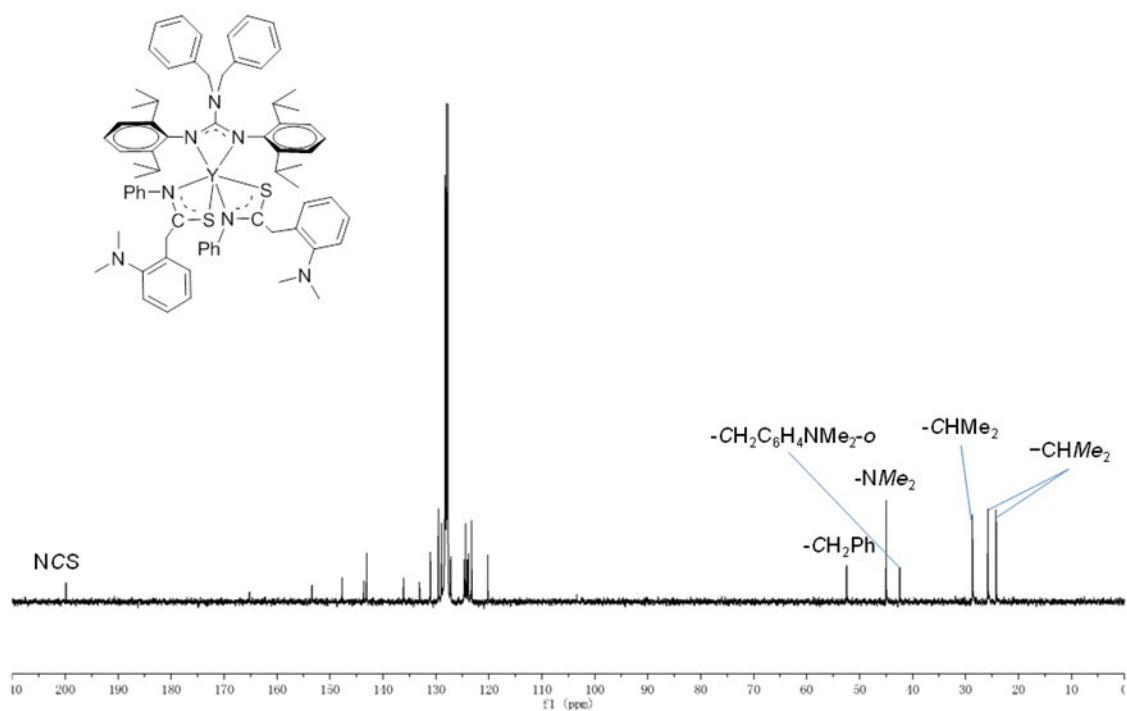

**Figure S24.**  $^{13}\text{C}$  NMR spectrum of **5a** obtained in  $\text{C}_6\text{D}_6$  at room temperature.

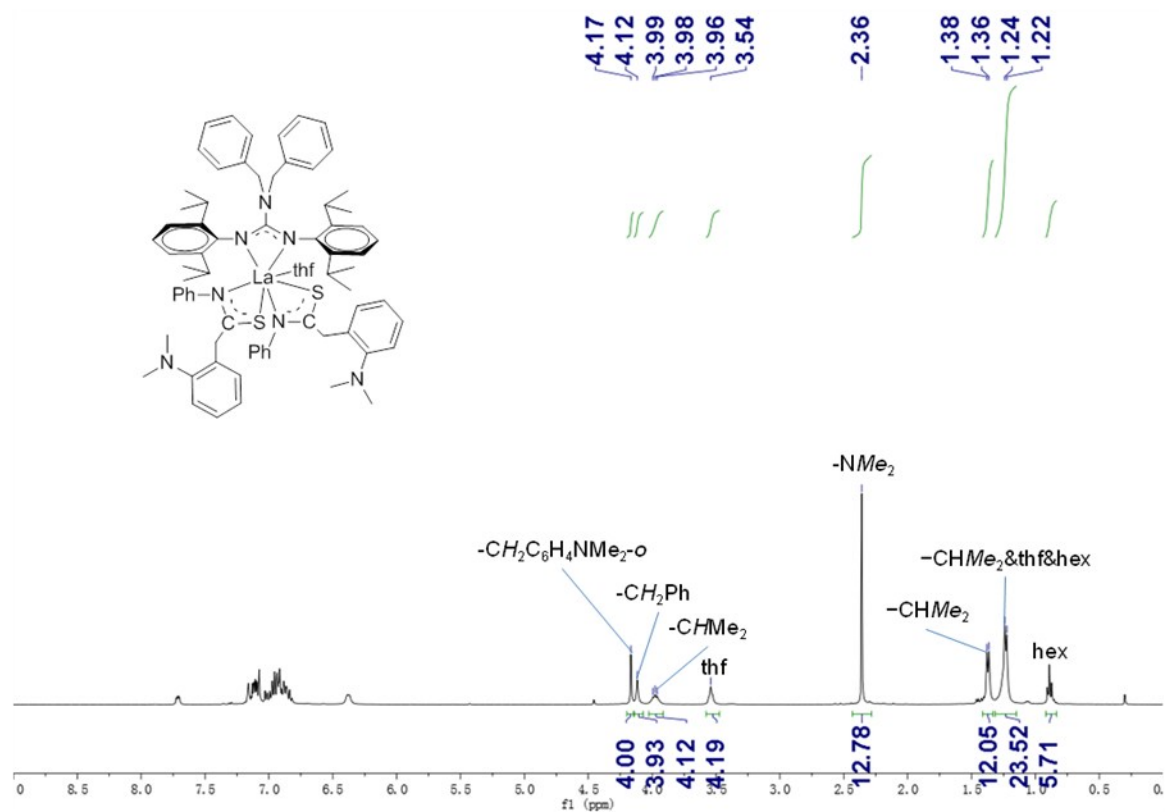

**Figure S25.**  $^1\text{H}$  NMR spectrum of **5b** obtained in  $\text{C}_6\text{D}_6$  at room temperature.

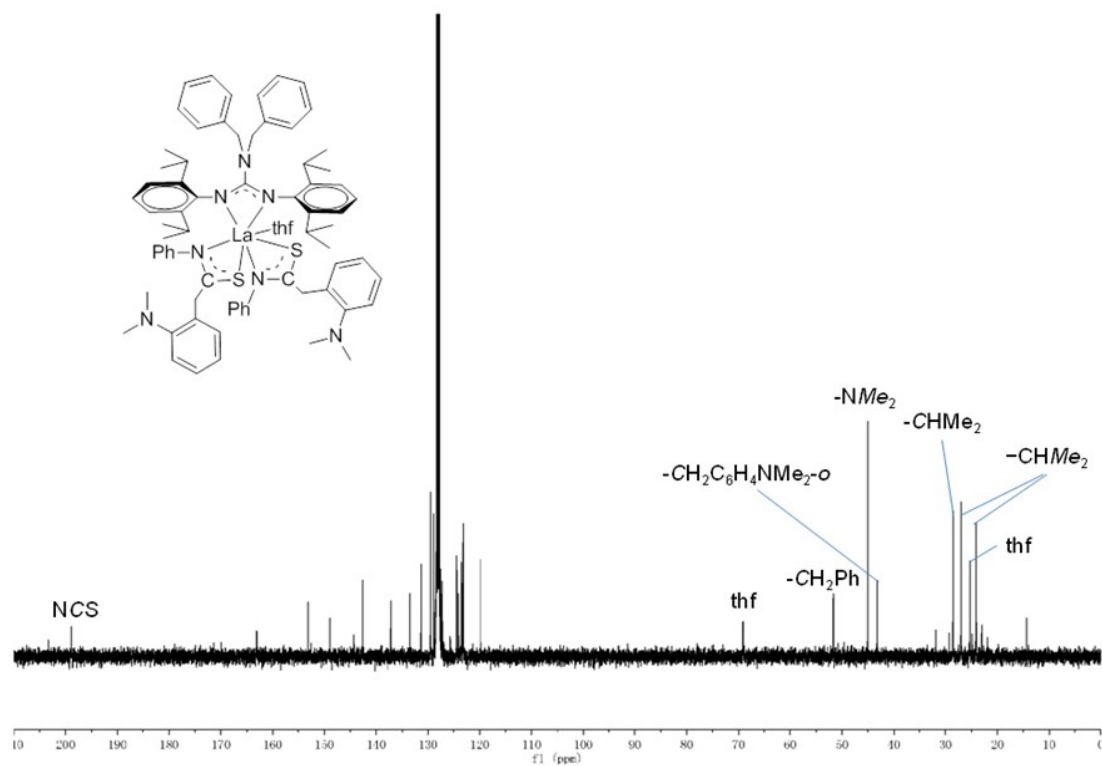

**Figure S26.**  $^{13}\text{C}$  NMR spectrum of **5b** obtained in  $\text{C}_6\text{D}_6$  at room temperature.

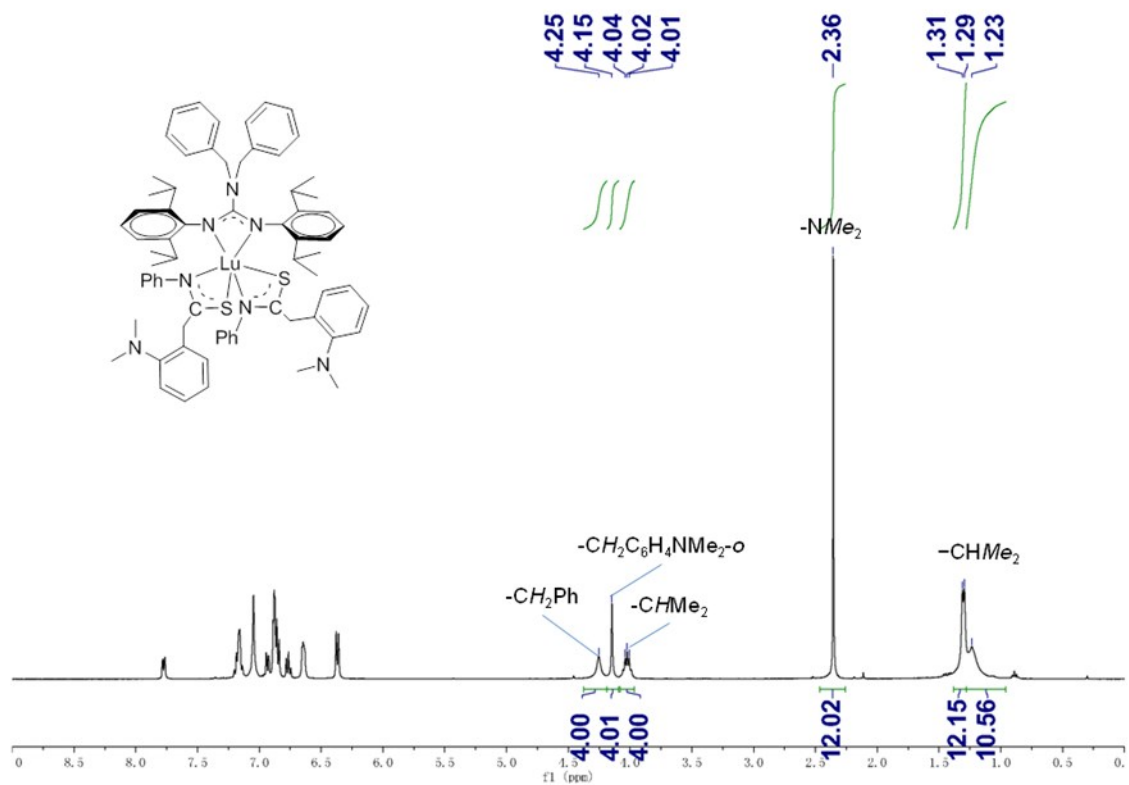

**Figure S27.**  $^1\text{H}$  NMR spectrum of **5d** obtained in  $\text{C}_6\text{D}_6$  at room temperature.

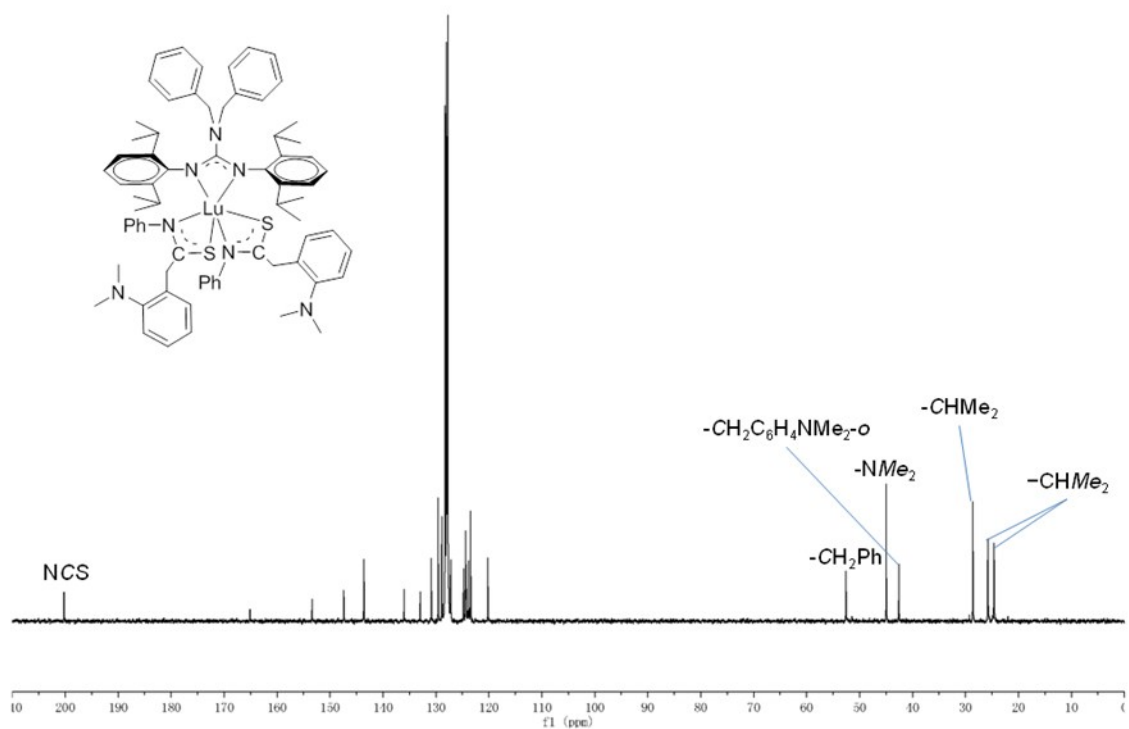

**Figure S28.**  $^{13}\text{C}$  NMR spectrum of **5d** obtained in  $\text{C}_6\text{D}_6$  at room temperature.

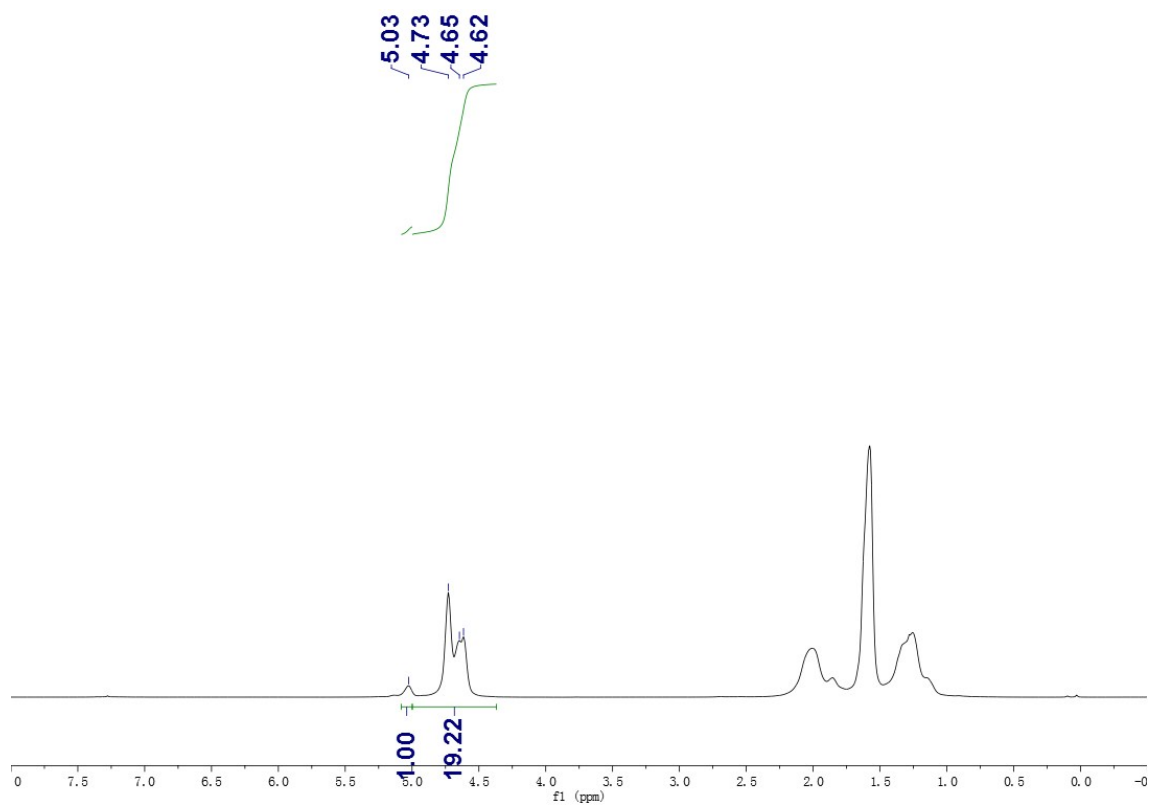

**Figure S29.**  $^1\text{H}$  NMR spectrum of PIP obtained by complex **2a**/[Ph<sub>3</sub>C][B(C<sub>6</sub>F<sub>5</sub>)<sub>4</sub>] binary system at 25 °C (Table 1, Entry 1)

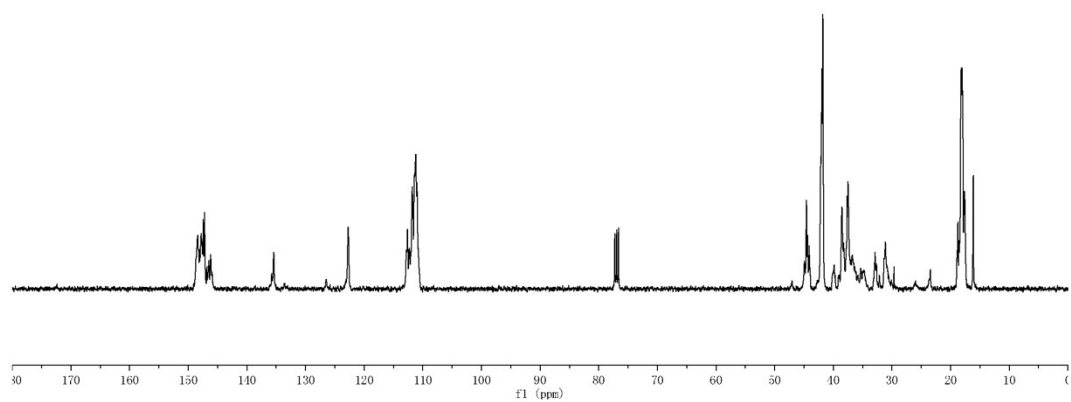

**Figure S30.**  $^{13}\text{C}$  NMR spectrum of PIP obtained by complex **2a**/[Ph<sub>3</sub>C][B(C<sub>6</sub>F<sub>5</sub>)<sub>4</sub>] binary system at 25 °C (Table 1, Entry 1)



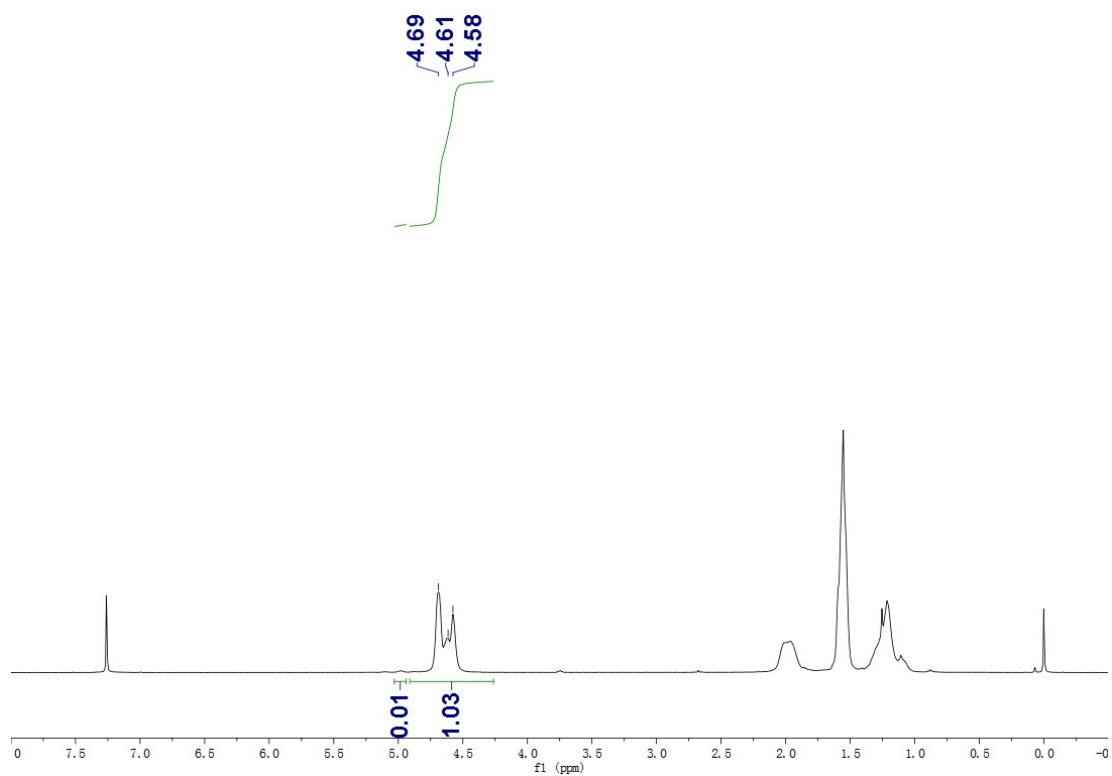

**Figure S31.**  $^1\text{H}$  NMR spectrum of PIP obtained by complex **2a**/[Ph<sub>3</sub>C][B(C<sub>6</sub>F<sub>5</sub>)<sub>4</sub>] binary system at -20 °C (Table 1, Entry 10)

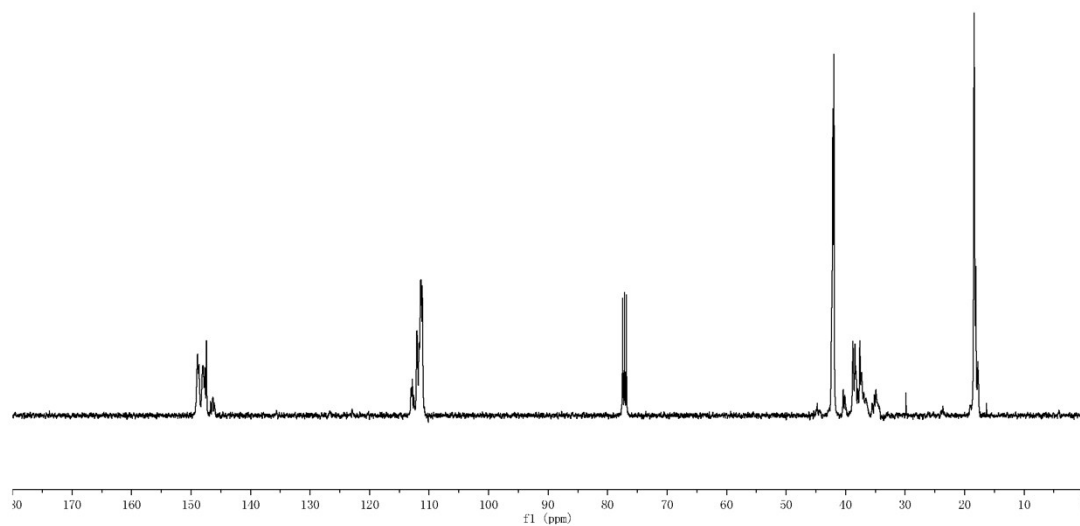

**Figure S32.**  $^{13}\text{C}$  NMR spectrum of PIP obtained by complex **2a**/[Ph<sub>3</sub>C][B(C<sub>6</sub>F<sub>5</sub>)<sub>4</sub>] binary system at -20 °C (Table 1, Entry 10)

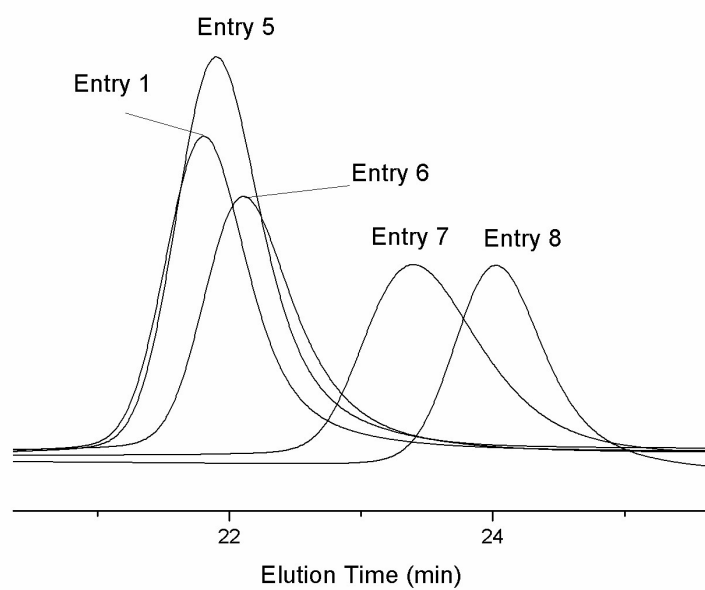

**Figure S33.** GPC curves of the PIP obtained by the complex **2a** at 25 °C (Table 1, Entries 1 and 5-8).

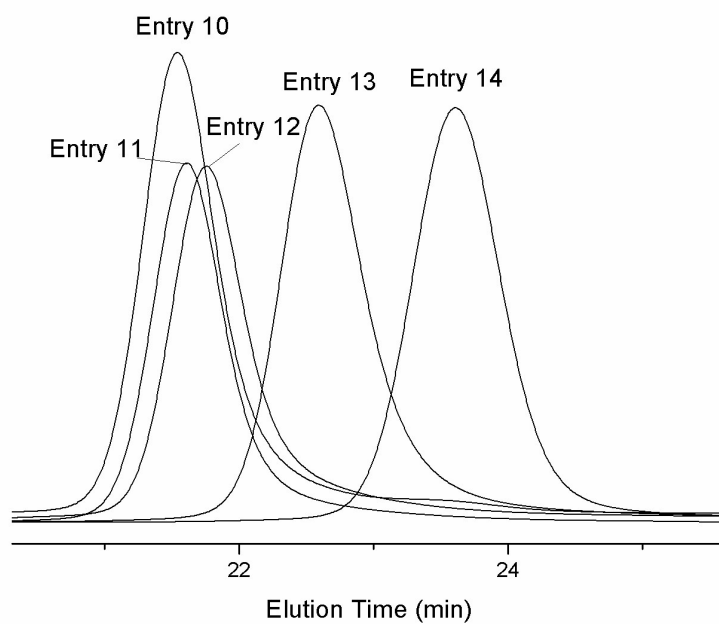

**Figure S34.** GPC curves of the PIP obtained by the complex **2a** at -20 °C (Table 1, Entries 1 and 10-14).

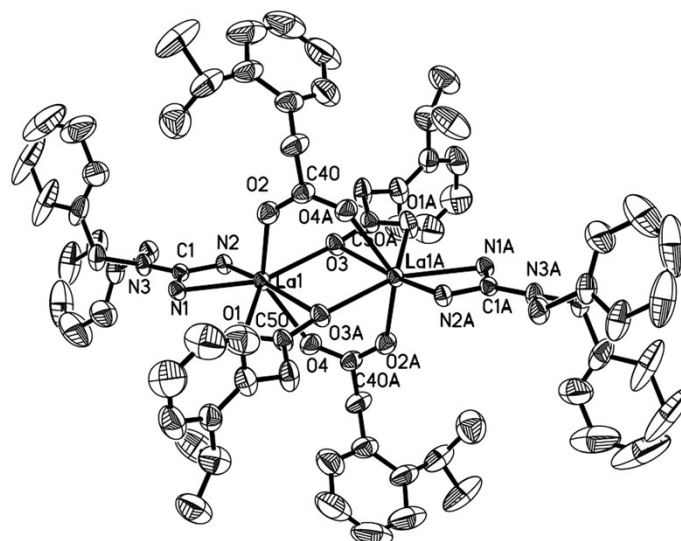

**Figure S35.** Molecular structure of complex **3b** with thermal ellipsoids at 30% probability. 2,6-Diisopropylphenyl groups of guanidinate ligand and all of the hydrogen atoms are omitted for clarity. Selected bond distances(Å) and angles(°): La(1)-O(4) 2.404(3), N(1)-C(1) 1.347(4), La(1)-O(2) 2.419(3), N(2)-C(1) 1.340(4), La(1)-O(3) 2.447(2), N(3)-C(1) 1.375(4), La(1)-O(1) 2.478(2), O(1)-C(50) 1.237(4), La(1)-O(3A) 2.803(3), O(3A)-C(50) 1.272(4), La(1)-N(1) 2.496(3), O(2)-C(40) 1.256(5), La(1)-N(2) 2.500(2), O(4A)-C(40) 1.260(5); O(4)-La(1)-O(2) 137.40(9), O(4)-La(1)-O(3) 74.65(9), O(2)-La(1)-O(3) 77.83(9), O(4)-La(1)-O(1) 84.07(10), O(2)-La(1)-O(1) 90.10(10), N(1)-La(1)-N(2) 52.83(8), N(2)-C(1)-N(1) 111.6(3), O(1)-C(50)-O(3A) 120.4(3), O(2)-C(40)-O(4A) 123.0(3).

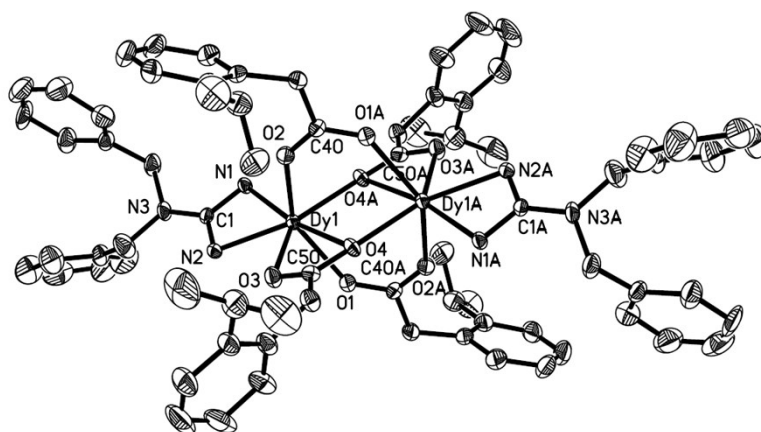

**Figure S36.** Molecular structure of complex **3c** with thermal ellipsoids at 30% probability. 2,6-Diisopropylphenyl groups of guanidinate ligand and all of the hydrogen atoms are omitted for clarity. Selected bond distances(Å) and angles(°): Dy(1)-O(1) 2.300(3), N(1)-C(1) 1.341(5), Dy(1)-O(2) 2.288(3), N(2)-C(1) 1.329(5), Dy(1)-O(3) 2.334(3), N(3)-C(1) 1.384(5), Dy(1)-O(4) 2.744(3), O(1A)-C(40) 1.268(5), Dy(1)-O(4A) 2.271(3), O(2)-C(40) 1.257(5), Dy(1)-N(2) 2.333(3), O(3)-C(50) 1.231(5), Dy(1)-N(1) 2.372(3), O(4)-C(50) 1.285(5); O(2)-Dy(1)-O(1) 141.18(10), O(4A)-Dy(1)-O(4) 84.93(9), O(4A)-Dy(1)-O(2) 82.46(10), O(4A)-Dy(1)-O(1)

76.87(10), O(2)-Dy(1)-O(3) 85.73(11), N(2)-Dy(1)-N(1) 55.91(11), N(2)-C(1)-N(1) 111.4(3), O(2)-C(40)-O(1A) 123.8(4), O(3)-C(50)-O(4) 120.2(4).

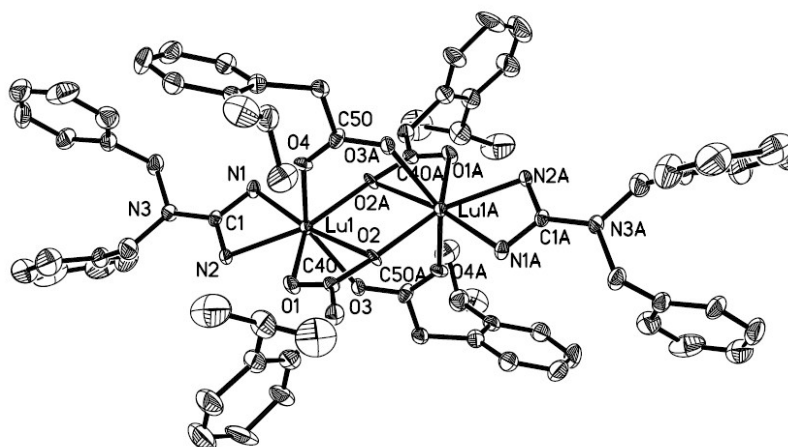

**Figure S37.** Molecular structure of complex **3d** with thermal ellipsoids at 30% probability. 2,6-Diisopropylphenyl groups of guanidinate ligand and all of the hydrogen atoms are omitted for clarity. Selected bond distances(Å) and angles(°): Lu(1)-O(2A) 2.205(4), N(1)-C(1) 1.287(9), Lu(1)-O(3) 2.234(5), N(2)-C(1) 1.329(9), Lu(1)-O(4) 2.238(4), N(3)-C(1) 1.401(8), Lu(1)-O(1) 2.268(5), O(1)-C(40) 1.222(9), Lu(1)-O(2) 2.762(5), O(2)-C(40) 1.309(8), Lu(1)-N(2) 2.294(5), O(3)-C(50A) 1.273(8), Lu(1)-N(1) 2.318(5), O(4)-C(50) 1.246(9); O(3)-Lu(1)-O(4) 140.51(17), O(2A)-Lu(1)-O(2) 85.33(16), O(2A)-Lu(1)-O(1) 135.47(18), O(4)-Lu(1)-O(1) 84.83(19), O(1)-Lu(1)-O(2) 50.18(15), N(2)-Lu(1)-N(1) 55.8(2), N(1)-C(1)-N(2) 111.1(6), O(1)-C(40)-O(2) 118.8(6), O(4)-C(50)-O(3A) 122.8(6).

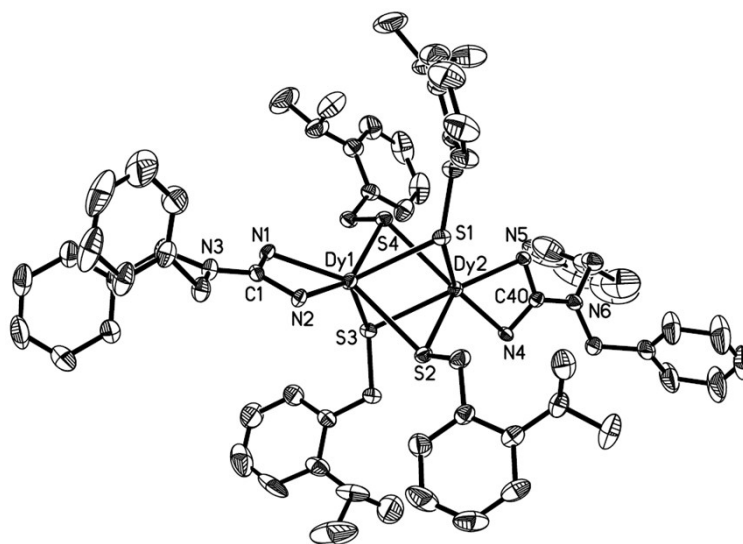

**Figure S38.** Molecular structure of complex **4c** with thermal ellipsoids at 30% probability. 2,6-Diisopropylphenyl groups of guanidinate ligand and all of the hydrogen atoms are omitted for clarity. Selected bond distances(Å) and angles(°): Dy(1)-N(2) 2.321(3), Dy(2)-S(4)

2.7896(11), Dy(1)-N(1) 2.327(3), Dy(2)-S(1) 2.8070(11), Dy(1)-S(1) 2.7915(11), Dy(2)-S(2) 2.8071(11), Dy(1)-S(2) 2.7980(11), N(1)-C(1) 1.363(5), Dy(1)-S(4) 2.8069(11), N(2)-C(1) 1.354(5), Dy(1)-S(3) 2.8422(11), N(3)-C(1) 1.363(5), Dy(2)-N(5) 2.323(3), N(4)-C(40) 1.340(5), Dy(2)-N(4) 2.348(3), N(5)-C(40) 1.374(5), Dy(2)-S(3) 2.7743(11), N(6)-C(40) 1.355(5); N(2)-Dy(1)-N(1) 56.80(11), S(1)-Dy(1)-S(2) 69.39(3), S(2)-Dy(1)-S(4) 106.14(3), N(5)-Dy(2)-N(4) 56.73(11), S(1)-Dy(2)-S(2) 69.04(3), S(4)-Dy(2)-S(2) 106.37(3), Dy(1)-S(1)-Dy(2) 73.78(3), Dy(1)-S(2)-Dy(2) 73.68(3), Dy(2)-S(3)-Dy(1) 73.49(3), Dy(2)-S(4)-Dy(1) 73.81(3), N(2)-C(1)-N(1) 108.9(3), N(4)-C(40)-N(5) 109.7(4).

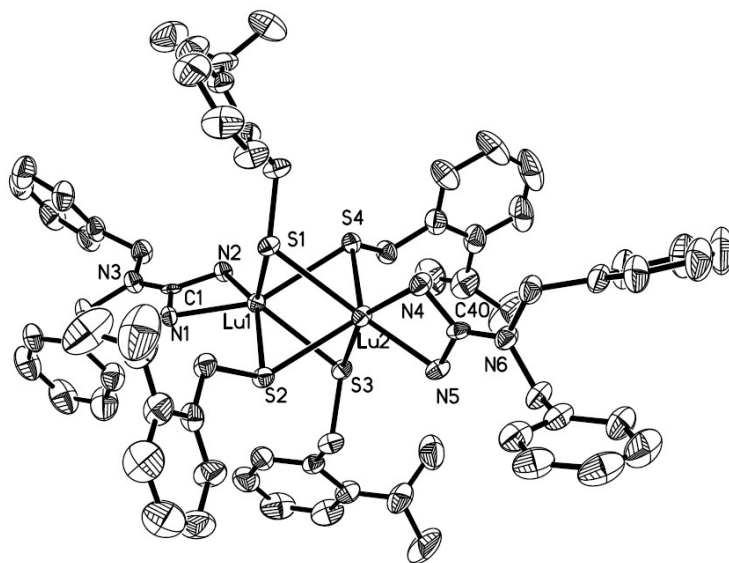

**Figure S39.** Molecular structure of complex **4d** with thermal ellipsoids at 30% probability. 2,6-Diisopropylphenyl groups of guanidinate ligand and all of the hydrogen atoms are omitted for clarity. Selected bond distances(Å) and angles(°): Lu(1)-N(2) 2.251(3), Lu(2)-S(2) 2.7483(11), Lu(1)-N(1) 2.268(3), Lu(2)-S(1) 2.7722(11), Lu(1)-S(1) 2.6988(11), Lu(2)-S(3) 2.7792(11), Lu(1)-S(3) 2.7180(11), N(1)-C(1) 1.380(5), Lu(1)-S(2) 2.7612(11), N(2)-C(1) 1.398(5), Lu(1)-S(4) 2.7677(11), N(3)-C(1) 1.310(5), Lu(2)-N(4) 2.256(3), N(4)-C(40) 1.374(5), Lu(2)-N(5) 2.287(3), N(5)-C(40) 1.369(5), Lu(2)-S(4) 2.7470(12), N(6)-C(40) 1.344(5); N(2)-Lu(1)-N(1) 58.53(12), S(1)-Lu(1)-S(3) 109.55(3), S(1)-Lu(1)-S(2) 69.36(3), N(4)-Lu(2)-N(5) 58.18(12), S(4)-Lu(2)-S(2) 108.52(3), S(4)-Lu(2)-S(1) 69.34(3), Lu(1)-S(1)-Lu(2) 72.57(3), Lu(2)-S(2)-Lu(1) 72.00(3), Lu(1)-S(3)-Lu(2) 72.18(3), Lu(2)-S(4)-Lu(1) 71.92(3), N(1)-C(1)-N(2) 105.3(3), N(5)-C(40)-N(4) 107.3(4).

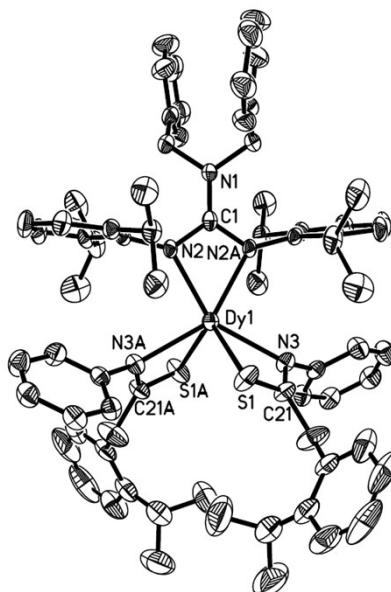

**Figure S40.** Molecular structure of complex **5c** with thermal ellipsoids at 30% probability. All of the hydrogen atoms are omitted for clarity. Selected bond distances(Å) and angles(°): Dy(1)-N(2/2A) 2.335(5), Dy(1)-N(3/3A) 2.430(5), Dy(1)-S(1/1A) 2.7221(19), S(1)-C(21) 1.752(6), N(2/2A)-C(1) 1.359(7), N(1)-C(1) 1.365(12), N(3)-C(21) 1.270(8); N(2)-Dy(1)-N(2A) 56.9(2), N(2A)-C(1)-N(2) 109.8(8), N(3)-Dy(1)-S(1) 60.37(12), N(3)-C(21)-S(1) 118.0(5), C(21)-S(1)-Dy(1) 78.2(2), C(21)-N(3)-Dy(1) 99.5(4).

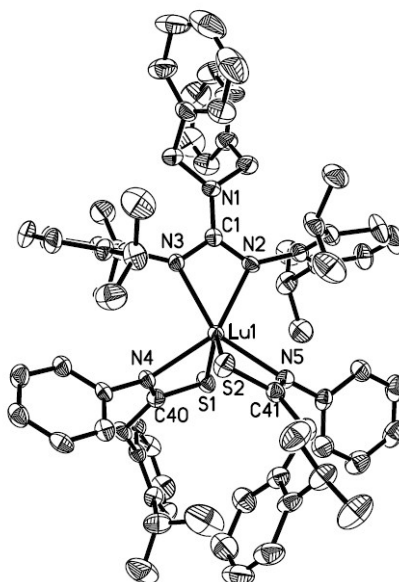

**Figure S41.** Molecular structure of complex **5d** with thermal ellipsoids at 30% probability. All of the hydrogen atoms are omitted for clarity. Selected bond distances(Å) and angles(°): Lu(1)-N(3) 2.265(5), Lu(1)-N(2) 2.286(5), Lu(1)-N(4) 2.321(5), Lu(1)-N(5) 2.350(5), Lu(1)-S(1) 2.6731(19), Lu(1)-S(2) 2.6828(18), S(1)-C(40) 1.726(6), S(2)-C(41) 1.722(6), N(1)-C(1) 1.397(8), N(4)-C(40) 1.293(8), N(5)-C(41) 1.307(7); N(3)-Lu(1)-N(2) 57.80(16), N(5)-Lu(1)-S(2) 61.90(11),

N(3)-Lu(1)-N(4) 94.60(17), S(1)-Lu(1)-S(2) 130.36(6), N(2)-Lu(1)-N(4) 142.84(18), C(40)-S(1)-Lu(1) 78.0(2), N(3)-Lu(1)-N(5) 148.12(19), C(41)-S(2)-Lu(1) 78.8(2), N(2)-Lu(1)-N(5) 100.47(17), C(1)-N(2)-Lu(1) 95.2(3), N(4)-Lu(1)-N(5) 113.87(18), C(1)-N(3)-Lu(1) 95.0(3), N(3)-Lu(1)-S(1) 115.43(13), C(40)-N(4)-Lu(1) 101.1(4), N(2)-Lu(1)-S(1) 104.74(13), C(41)-N(5)-Lu(1) 100.6(4), N(4)-Lu(1)-S(1) 62.35(12), N(2)-C(1)-N(3) 112.1(5), N(5)-Lu(1)-S(1) 91.40(13), N(2)-C(1)-N(1) 124.9(5), N(3)-Lu(1)-S(2) 106.39(12), N(3)-C(1)-N(1) 123.0(5), N(2)-Lu(1)-S(2) 120.03(13), N(4)-C(40)-S(1) 118.4(5), N(4)-Lu(1)-S(2) 89.70(13), N(5)-C(41)-S(2) 117.9(5).

**Table S1.** Crystal data and refinement details of complexes **1,3b-d**

|                                                             | <b>1</b>                                                           | <b>3b</b>                                                         | <b>3c</b>                                                         | <b>3d</b>                                                         |
|-------------------------------------------------------------|--------------------------------------------------------------------|-------------------------------------------------------------------|-------------------------------------------------------------------|-------------------------------------------------------------------|
| Formula                                                     | C <sub>39</sub> H <sub>48</sub> N <sub>3</sub>                     | C <sub>59</sub> H <sub>72</sub> N <sub>5</sub> O <sub>4</sub> La  | C <sub>59</sub> H <sub>72</sub> N <sub>5</sub> O <sub>4</sub> Dy  | C <sub>59</sub> H <sub>72</sub> N <sub>5</sub> O <sub>4</sub> Lu  |
| Formula weight                                              | 558.80                                                             | 1054.13                                                           | 1077.71                                                           | 1090.18                                                           |
| Temperature (K)                                             | 293(2)                                                             | 273(2)                                                            | 273(2)                                                            | 296(2)                                                            |
| Wavelength(Å)                                               | 0.71073                                                            | 0.71073                                                           | 0.71073                                                           | 0.71073                                                           |
| Crystal system                                              | Triclinic                                                          | Monoclinic                                                        | Triclinic                                                         | Triclinic                                                         |
| space group                                                 | P-1                                                                | P2(1)/n                                                           | P-1                                                               | P-1                                                               |
| <i>a</i> (Å)                                                | 10.323(8)                                                          | 17.229(2)                                                         | 13.052(3)                                                         | 13.0131(13)                                                       |
| <i>b</i> (Å)                                                | 10.930(8)                                                          | 16.7584(19)                                                       | 16.105(3)                                                         | 16.0451(16)                                                       |
| <i>c</i> (Å)                                                | 16.132(12)                                                         | 20.095(2)                                                         | 16.969(6)                                                         | 16.917(3)                                                         |
| $\alpha$ (°)                                                | 79.031(7)                                                          | 90                                                                | 103.980(3)                                                        | 103.838(2)                                                        |
| $\beta$ (°)                                                 | 82.038(9)                                                          | 107.6720                                                          | 104.552(3)                                                        | 104.826(2)                                                        |
| $\gamma$ (°)                                                | 82.388(9)                                                          | 90                                                                | 112.507(2)                                                        | 112.459(2)                                                        |
| <i>V</i> (Å <sup>3</sup> )                                  | 1759(2)                                                            | 5528.3(11)                                                        | 2953.3(13)                                                        | 2922.6(6)                                                         |
| <i>Z</i>                                                    | 2                                                                  | 4                                                                 | 2                                                                 | 2                                                                 |
| <i>D<sub>c</sub></i> (g/cm <sup>3</sup> )                   | 1.055                                                              | 1.267                                                             | 1.212                                                             | 1.239                                                             |
| $\mu$ (mm <sup>-1</sup> )                                   | 0.061                                                              | 0.82                                                              | 1.310                                                             | 1.735                                                             |
| <i>F</i> (000)                                              | 606                                                                | 2200                                                              | 1118                                                              | 1128                                                              |
| Crystal size (mm <sup>3</sup> )                             | 0.40x0.40x0.10                                                     | 0.40x0.32x0.26                                                    | 0.42x0.38x0.35                                                    | 0.50x0.48x0.43                                                    |
| $\theta$ range (°)                                          | 1.295 to 25.050                                                    | 1.37 to 25.05                                                     | 1.339 to 25.05                                                    | 1.483 to 25.049                                                   |
| <i>h</i> , <i>k</i> , <i>l</i> range                        | -6<= <i>h</i> <=12,<br>-12<= <i>k</i> <=13,<br>-19<= <i>l</i> <=19 | -20<= <i>h</i> <=20<br>-19<= <i>k</i> <=19<br>-14<= <i>l</i> <=23 | -15<= <i>h</i> <=14<br>-19<= <i>k</i> <=19<br>-20<= <i>l</i> <=19 | -15<= <i>h</i> <=15<br>-19<= <i>k</i> <=19<br>-20<= <i>l</i> <=13 |
| Reflections collected                                       | 8582                                                               | 26960                                                             | 14407                                                             | 17550                                                             |
| Reflections unique                                          | 6058                                                               | 9767                                                              | 10192                                                             | 10217                                                             |
| Completeness to $\theta$                                    | [R(int)=0.0235]<br>97.2 % ( $\theta$ = 25.05)                      | [R(int)=0.0259]<br>99.8 % ( $\theta$ = 25.05)                     | [R(int) = 0.0238]<br>97.4 % ( $\theta$ = 25.05)                   | [R(int) = 0.0305]<br>98.7 % ( $\theta$ = 25.049)                  |
| Max. and min. Transmission                                  | 0.7455 and 0.6045                                                  | 0.8148 and 0.7347                                                 | 0.7456 and 0.4990                                                 | 0.7455 and 0.4760                                                 |
| Refinement method                                           | Full-matrix least-squares on <i>F</i> <sup>2</sup>                 | Full-matrix least-squares on <i>F</i> <sup>2</sup>                | Full-matrix least-squares on <i>F</i> <sup>2</sup>                | Full-matrix least-squares on <i>F</i> <sup>2</sup>                |
| Data / restraints / parameters                              | 6058 / 0 / 388                                                     | 9767 / 0 / 622                                                    | 10192 / 0 / 634                                                   | 10217 / 0 / 634                                                   |
| Goodness-of-fit on <i>F</i> <sup>2</sup>                    | 1.047                                                              | 1.051                                                             | 0.983                                                             | 1.032                                                             |
| Final <i>R</i> indices [ <i>I</i> >2 $\sigma$ ( <i>I</i> )] | <i>R</i> <sub>1</sub> = 0.0618, <i>wR</i> <sub>2</sub> = 0.1760    | <i>R</i> <sub>1</sub> = 0.0379, <i>wR</i> <sub>2</sub> = 0.1046   | <i>R</i> <sub>1</sub> = 0.0349, <i>wR</i> <sub>2</sub> = 0.0916   | <i>R</i> <sub>1</sub> = 0.0468, <i>wR</i> <sub>2</sub> = 0.1399   |
| <i>R</i> indices (all data)                                 | <i>R</i> <sub>1</sub> = 0.0877, <i>wR</i> <sub>2</sub> = 0.1995    | <i>R</i> <sub>1</sub> = 0.0549, <i>wR</i> <sub>2</sub> = 0.1213   | <i>R</i> <sub>1</sub> = 0.0454, <i>wR</i> <sub>2</sub> = 0.0940   | <i>R</i> <sub>1</sub> = 0.0587, <i>wR</i> <sub>2</sub> = 0.1774   |
| Largest diff. peak and hole (e Å <sup>-3</sup> )            | 0.508 and -0.264                                                   | 0.906 and -0.462                                                  | 1.004 and -0.697                                                  | 1.524 and -1.852                                                  |

**Table S2.** Crystal data and refinement details of complexes **4c, 4d, 5c, 5d**



|                                                       | <b>4c</b>                                                          | <b>4d</b>                                                          | <b>5c</b>                                                           | <b>5d</b>                                                         |
|-------------------------------------------------------|--------------------------------------------------------------------|--------------------------------------------------------------------|---------------------------------------------------------------------|-------------------------------------------------------------------|
| Formula                                               | C <sub>114</sub> H <sub>144</sub> N <sub>10</sub> S <sub>4</sub> D | C <sub>114</sub> H <sub>144</sub> N <sub>10</sub> S <sub>4</sub> L | C <sub>71</sub> H <sub>82</sub> N <sub>7</sub> S <sub>2</sub> Dy    | C <sub>71</sub> H <sub>82</sub> N <sub>7</sub> S <sub>2</sub> Lu  |
|                                                       | y <sub>2</sub>                                                     | u <sub>2</sub>                                                     |                                                                     |                                                                   |
| Formula weight                                        | 2107.63                                                            | 2132.57                                                            | 1260.06                                                             | 1272.53                                                           |
| Temperature (K)                                       | 273(2)                                                             | 273(2)                                                             | 273(2)                                                              | 293(2)                                                            |
| Wavelength(Å)                                         | 0.71073                                                            | 0.71073                                                            | 0.71073                                                             | 0.71073                                                           |
| Crystal system                                        | Monoclinic                                                         | Triclinic                                                          | Monoclinic                                                          | Triclinic                                                         |
| space group                                           | P2(1)/n                                                            | P-1                                                                | C2/c                                                                | P-1                                                               |
| <i>a</i> (Å)                                          | 15.4557(17)                                                        | 14.1932(16)                                                        | 13.114(3)                                                           | 10.950(4)                                                         |
| <i>b</i> (Å)                                          | 23.843(3)                                                          | 15.3802(18)                                                        | 26.401(6)                                                           | 14.310(5)                                                         |
| <i>c</i> (Å)                                          | 31.373(4)                                                          | 30.149(4)                                                          | 19.568(5)                                                           | 22.145(7)                                                         |
| $\alpha$ (deg)                                        | 90                                                                 | 94.987(2)                                                          | 90                                                                  | 106.075(4)                                                        |
| $\beta$ (deg)                                         | 98.9200(10)                                                        | 92.195(2)                                                          | 104.312(3)                                                          | 93.766(4)                                                         |
| $\gamma$ (deg)                                        | 90                                                                 | 116.5510(10)                                                       | 90                                                                  | 98.308(4)                                                         |
| <i>V</i> (Å <sup>3</sup> )                            | 11421(2)                                                           | 5842.9(13)                                                         | 6565(3)                                                             | 3278.7(19)                                                        |
| <i>Z</i>                                              | 4                                                                  | 2                                                                  | 4                                                                   | 2                                                                 |
| <i>D</i> <sub>c</sub> (g/cm <sup>3</sup> )            | 1.226                                                              | 1.212                                                              | 1.275                                                               | 1.289                                                             |
| $\mu$ (mm <sup>-1</sup> )                             | 1.419                                                              | 1.798                                                              | 1.247                                                               | 1.615                                                             |
| <i>F</i> (000)                                        | 4376                                                               | 2208                                                               | 2620                                                                | 1320                                                              |
| Crystal size (mm)                                     | 0.32 x 0.30 x<br>0.24                                              | 0.36 x 0.30 x<br>0.25                                              | 0.40 x 0.35 x<br>0.30                                               | 0.33 x 0.20 x<br>0.18                                             |
| $\theta$ range (°)                                    | 1.08 to 25.05                                                      | 1.49 to 25.05                                                      | 1.54 to 25.05                                                       | 1.50 to 25.05                                                     |
| <i>h</i> , <i>k</i> , <i>l</i> range                  | -18<= <i>h</i> <=16<br>-28<= <i>k</i> <=27<br>-37<= <i>l</i> <=29  | -11<= <i>h</i> <=16<br>-18<= <i>k</i> <=18<br>-35<= <i>l</i> <=35  | -13<= <i>h</i> <=15 -<br>31<= <i>k</i> <=22 -<br>23<= <i>l</i> <=23 | -12<= <i>h</i> <=12<br>-17<= <i>k</i> <=16<br>-17<= <i>l</i> <=26 |
| Reflections collected                                 | 56673                                                              | 29365                                                              | 15475                                                               | 12846                                                             |
| Reflections unique                                    | 20182                                                              | 20350                                                              | 5809                                                                | 10967                                                             |
| Completeness to $\theta$                              | [R(int)=0.0508]<br>99.8 % ( $\theta$ = 25.05)                      | [R(int)=0.0235]<br>98.3 % ( $\theta$ = 25.05)                      | [R(int)=0.0866]<br>99.7 % ( $\theta$ = 25.05)                       | [R(int)=0.0249]<br>94.8 % ( $\theta$ = 25.05)                     |
| Max. and min. Transmission                            | 0.7269 and 0.6595                                                  | 0.6621 and 0.5638                                                  | 0.7060 and 0.6353                                                   | 0.7598 and 0.6179                                                 |
| Refinement method                                     | Full-matrix least-squares on F <sup>2</sup>                        | Full-matrix least-squares on F <sup>2</sup>                        | Full-matrix least-squares on F <sup>2</sup>                         | Full-matrix least-squares on F <sup>2</sup>                       |
| Data / restraints / parameters                        | 20182 / 12 / 1183                                                  | 20350 / 0 / 1195                                                   | 5809 / 0 / 373                                                      | 10967 / 0 / 742                                                   |
| Goodness-of-fit on F <sup>2</sup>                     | 1.014                                                              | 1.029                                                              | 1.006                                                               | 1.044                                                             |
| Final R indices [ <i>I</i> > 2 $\sigma$ ( <i>I</i> )] | R <sub>1</sub> = 0.0409,<br>wR <sub>2</sub> = 0.0770               | R <sub>1</sub> = 0.0379,<br>wR <sub>2</sub> = 0.0959               | R <sub>1</sub> = 0.0783,<br>wR <sub>2</sub> = 0.1827                | R <sub>1</sub> = 0.0405,<br>wR <sub>2</sub> = 0.1294              |
| R indices (all data)                                  | R <sub>1</sub> = 0.0718,<br>wR <sub>2</sub> = 0.0823               | R <sub>1</sub> = 0.0593,<br>wR <sub>2</sub> = 0.1027               | R <sub>1</sub> = 0.0898,<br>wR <sub>2</sub> = 0.1915                | R <sub>1</sub> = 0.0530,<br>wR <sub>2</sub> = 0.1465              |
| Largest diff. peak and hole (e Å <sup>-3</sup> )      | 1.164 and -0.782                                                   | 1.088 and -0.675                                                   | 2.682 and -5.264                                                    | 1.392 and -1.030                                                  |
